# Supplementary material for: Climate control on terrestrial biospheric carbon turnover
Source: PubMed Central journal article supplement — Proc Natl Acad Sci U S A. 2021 Feb 15;118(8):e2011585118. doi: 10.1073/pnas.2011585118 (PMC7923348; doi:10.1073/pnas.2011585118), 2021-02-15
Supplement: pnas.2011585118.sapp.pdf [file pnas.2011585118.sapp.pdf]

# SI Appendix for

## Climate control on terrestrial biospheric carbon turnover

Timothy I. Eglinton, Valier V. Galy, Jordon D. Hemingway, Xiaojuan Feng, Hongyan Bao, Thomas M. Blattmann, Angela F. Dickens, Hannah Gies, Liviu Giosan, Negar Haghypour, Pengfei Hou, Maarten Lupker, Cameron P. McIntyre, Daniel B. Montluçon, Bernhard Peucker-Ehrenbrink, Camilo Ponton, Enno Schefuß, Melissa S. Schwab, Britta M. Voss, Lukas Wacker, Ying Wu, Meixun Zhao.

Correspondence to: [timothy.eglinton@erdw.ethz.ch](mailto:timothy.eglinton@erdw.ethz.ch); [vgaly@whoi.edu](mailto:vgaly@whoi.edu)

### **This PDF file includes:**

Figures S1 to S8  
Tables S1 to S5  
Caption for Dataset S1  
References for SI Appendix

### **Other Supporting Information for this manuscript include the following:**

Dataset S1

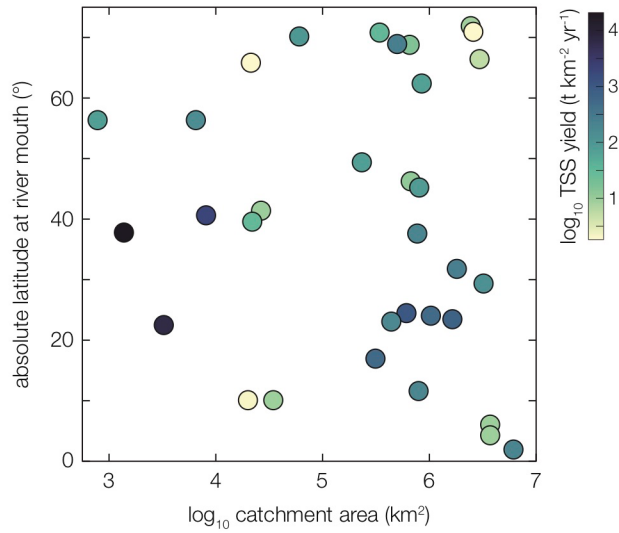

23

24 **Figure S1. Catchment latitude as a function of area.** Absolute value of latitude at the river  
 25 mouth plotted as a function of catchment area for all river basins used in this study. Markers are  
 26 additionally color coded by total suspended sediment (TSS) yield. There exists no correlation  
 27 between catchment area and latitude at the river mouth, indicating that our sample set provides  
 28 adequate global coverage and that covariance between these properties will not bias our results.

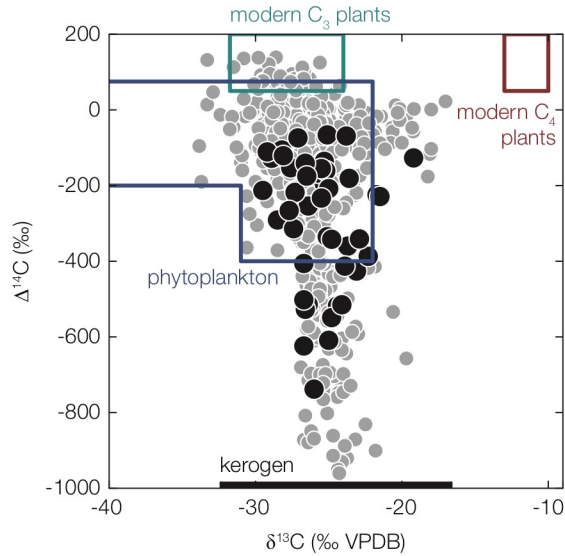

29

30 **Figure S2. River POC dual isotope plot.** Bulk POC  $\delta^{13}\text{C}$  values (relative to Vienna Pee Dee  
 31 Belemnite) vs.  $^{14}\text{C}$  content reported in  $\Delta^{14}\text{C}$  notation ( $I$ ), which allows for the inclusion of samples  
 32 with “above modern”  $^{14}\text{C}$  ages due to incorporation of nuclear-bomb-derived  $^{14}\text{C}$ . All samples  
 33 from the database of Marwick et al. (2) are shown as gray circles; all samples from this study are  
 34 shown as black circles. Importantly, samples from this study span a majority of the variability seen  
 35 in the global database, indicating that results from our sample set likely reflect global phenomena.  
 36 Estimates of end-member OC compositions are also plotted as colored boxes (2).  
 37

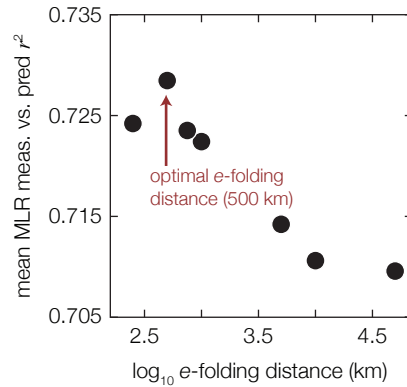

38

39 **Figure S3. MLR correlations with  $e$ -folding distance.** The mean of multiple linear regression  
 40 (MLR)  $r^2$  values for all biomarker and POC  $^{14}\text{C}$  and  $\delta^{13}\text{C}$  response variables plotted as a function  
 41 of weighting  $e$ -folding distance. Higher  $e$ -folding distances result in control variable values that  
 42 are more uniformly integrated across the river basin, with the longest  $e$ -folding length equivalent  
 43 to catchment-wide integration. Here, we choose 500 km as the optimal  $e$ -folding distance for  
 44 determination of catchment-weighted parameters, as this value maximizes MLR  $r^2$  values.

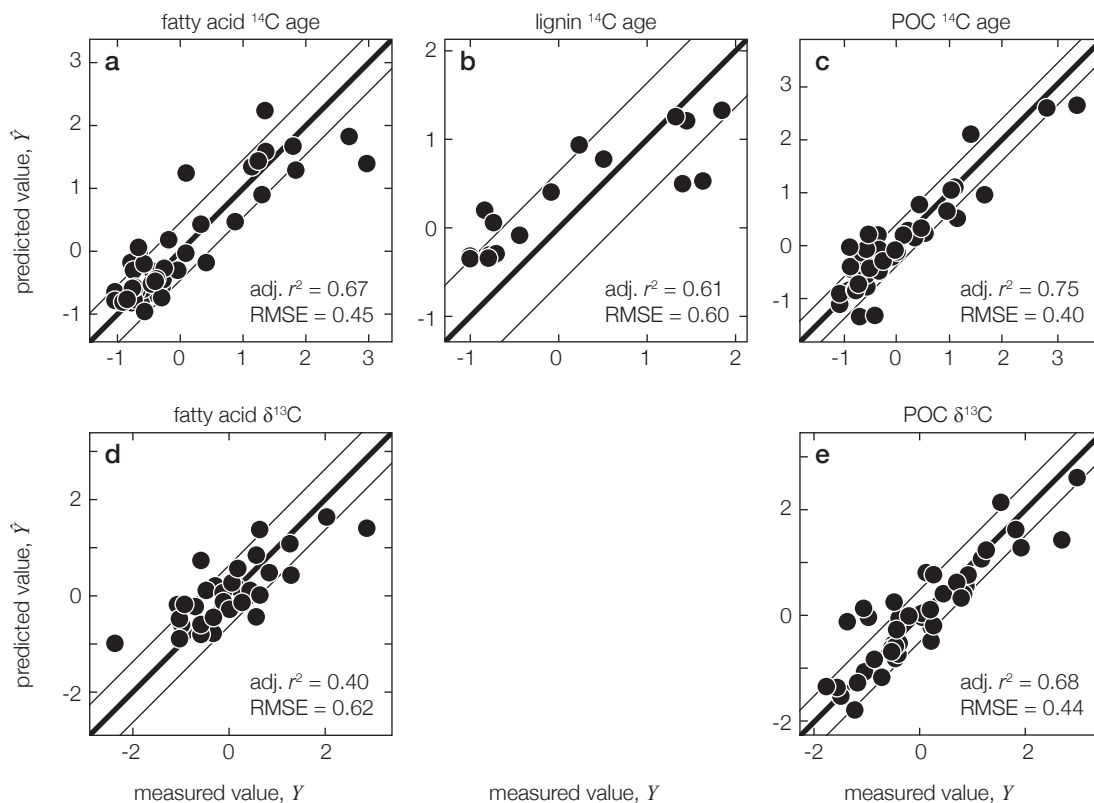

45

46 **Figure S4. Measured vs. MLR-predicted response variables.** Multiple-linear-regression (MLR)  
 47 predicted **A**, plant-wax fatty acid  $^{14}\text{C}$  age, **B**, lignin phenol  $^{14}\text{C}$  age, **C**, bulk POC  $^{14}\text{C}$  age, **D**, plant-  
 48 wax fatty acid  $^{13}\text{C}$  composition, and **E**, bulk POC  $^{13}\text{C}$  composition as a function of their measured  
 49 values. For each panel, thick black line is the 1:1 line and thin black lines represent  $\pm 1$  root mean  
 50 square error (RMSE) about the 1:1 line;  $\text{adj. } r^2$  refers to the adjusted  $r^2$  value that removes the  
 51 effect of spurious improvement resulting from increasing the number of predictor variables. All  
 52 measured and predicted values have been scaled such that each distribution has a mean of zero and  
 53 a standard deviation of unity.

54

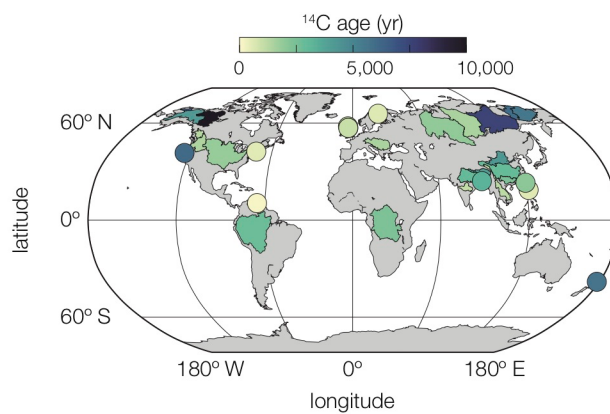

55

56 **Figure S5. Riverine POC  $^{14}\text{C}$  ages.** Catchment areas of all rivers analyzed in this study color-  
57 coded by bulk POC  $^{14}\text{C}$  ages (*SI Appendix, Table S1*). Rivers with catchment areas smaller than  
58 30,000 km<sup>2</sup> are shown as colored circles for clarity. Legend is the same as in Fig. 1.

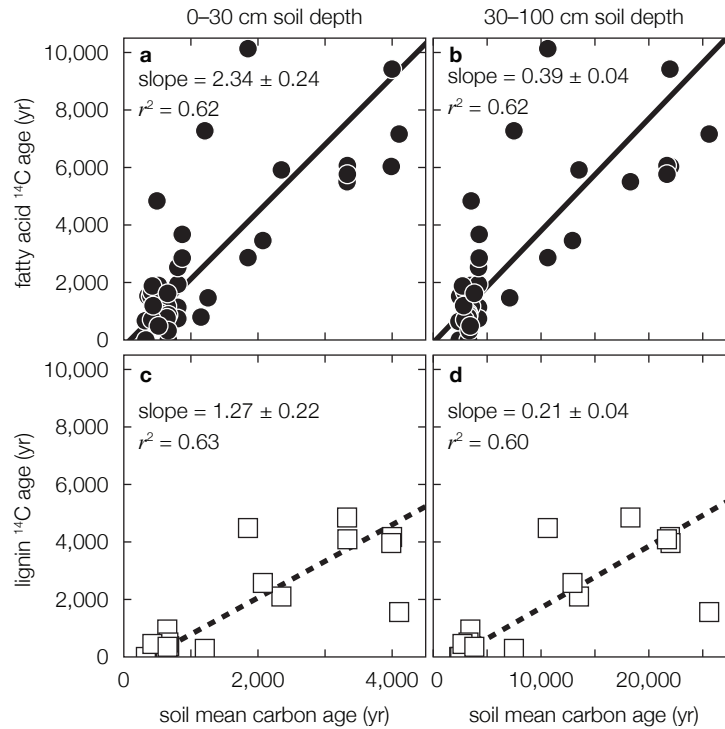

59

60 **Figure S6. Relationships between soil mean carbon age and biomarker  $^{14}\text{C}$  age.** a and b, Plant-  
 61 wax fatty acid, and c and d, lignin phenol  $^{14}\text{C}$  ages as a function of soil mean carbon age (0-30 cm,  
 62 left panels; 30-100 cm, right panels). Solid and dashed black lines are reduced major axis  
 63 regression lines; reported values are the corresponding reduced major axis regression slopes and  
 64  $r^2$  values (*Materials and Methods*). Uncertainty ( $\pm 1\sigma$ ) is always smaller than marker points.

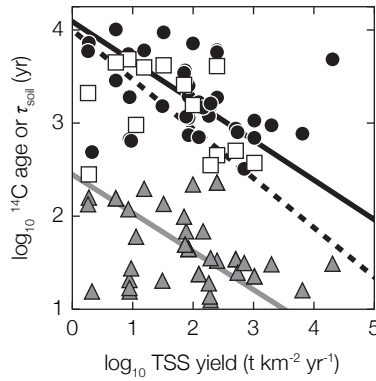

65

66 **Figure S7. TSS controls on soil carbon turnover times and biomarker  $^{14}\text{C}$  ages.** Logarithmic  
 67 plant-wax fatty acid  $^{14}\text{C}$  ages (black circles), lignin phenol  $^{14}\text{C}$  ages (white squares), and catchment  
 68 soil carbon turnover times ( $\tau_{\text{soil}}$ ; gray triangles) (3) as functions of total suspended sediment (TSS)  
 69 yield (*SI Appendix, Tables S1, S3*). Solid black, dashed black, and gray lines are plant-wax fatty  
 70 acid, lignin phenol, and  $\tau_{\text{soil}}$  reduced major axis regression lines, respectively (*Materials and*  
 71 *Methods*). Relationship slopes and  $r^2$  values are as follows: fatty acid  $^{14}\text{C}$  ages: slope =  $-0.42 \pm$   
 72  $0.08$ ,  $r^2 = 0.07$ ; lignin phenol  $^{14}\text{C}$  ages: slope =  $-0.53 \pm 0.18$ ,  $r^2 = 0.12$ ,  $\tau_{\text{soil}}$ : slope =  $-0.41 \pm 0.08$ ,  
 73  $r^2 = 0.10$ .



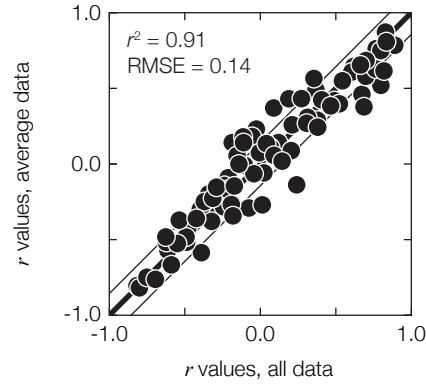

74

75 **Figure S8. All vs. averaged correlation coefficients.** Cross plot of all correlation coefficients  
76 between environmental control variables and isotope response variables when either “all” or  
77 “catchment-averaged” response variable datasets are used (i.e., [SI Appendix, Table S1 or S2](#)).  
78 Thick black line is the 1:1 line and thin black lines represent  $\pm 1$  root mean square error (RMSE)  
79 about the 1:1 line. Although some scatter exists, correlation coefficients are largely independent  
80 of the chosen response variable dataset used; that is, they plot close to the 1:1 line.

81

82 **Table S1.** Average bulk POC, fatty acid, and lignin  $^{14}\text{C}$  ages and  $\delta^{13}\text{C}$  values for all river basins  
83 used in this study, including information on sample type (suspended sediment, bedload, or deposit  
84 sediment), collection year, GPS coordinates, and original data source.

85  
86 **Table S2.** Similar to Supplementary Table 1 but including all individual data points for all river  
87 basins.

88  
89 **Table S3.** All environmental and geomorphic control variables, including spatially resolved  
90 variables at various  $e$ -folding distances as well as notes on data sources.

91  
92 **Table S4.** Multiple linear regression (MLR) results and statistics, including correlation coefficients  
93 ( $r$  values) and statistical significance  $p$  values.

94  
95 **Table S5.** Redundancy analysis (RDA) results and statistics, including control variable loadings,  
96 response variable loadings, and individual sample scores for each RDA canonical axis.

97  
98 **Supplementary Dataset S1.** Input Python code needed to perform all statistical analyses and  
99 generate all tables and figures provided in this manuscript.

100 **References for SI Appendix:**

- 101 1. Stuiver, M., Polach, H.A. Discussion: reporting of  $^{14}\text{C}$  data. *Radiocarbon* **19**, 355–363 (1977).
- 102 2. Marwick, T.R., Tamooh, F., Teodoru, C.R., Borges, A.V., Darchambeau, F., Bouillon, S. The
- 103 age of river-transported carbon: A global perspective. *Glob. Biogeochem. Cy.* **29**, 122–137
- 104 (2015).
- 105 3. Bloom, A.A., Exbrayat, J.F., van der Velde, I.R., Feng, L., Williams, M. The decadal state of
- 106 the terrestrial carbon cycle: Global retrievals of terrestrial carbon allocation, pools, and
- 107 residence times. *Proc. Natl. Acad. Sci.* **113**, 1285–1290 (2016).
- 108 4. Galy, V., Eglinton, T.I. Protracted storage of biospheric carbon in the Ganges-Brahmaputra
- 109 basin. *Nature Geosci.* **4**, 843–847 (2011).
- 110 5. Vonk, J.E., Drenzek, N.J., Hughen, K.A., Stanley, R.H.R., McIntyre, C., Montluçon, D.B.,
- 111 Giosan, L., Southon, J.R., Santos, G.M., Druffel, E.R.M., Andersson, A.A., Sköld, M.,
- 112 Eglinton, T.I. Temporal deconvolution of vascular plant-derived fatty acids exported from
- 113 terrestrial watersheds. *Geochim. Cosmochim. Ac.* **244**, 502–521 (2019).
- 114 6. Feng, X., Benitez-Nelson, B.C., Montluçon, D.B., Prahl F.G., McNichol, A.P., Xu, L., Repeta,
- 115 D.J., Eglinton, T.I.  $^{14}\text{C}$  and  $^{13}\text{C}$  characteristics of higher plant biomarkers in Washington
- 116 margin surface sediments. *Geochim. Cosmochim. Ac.* **105**, 14–30 (2013).
- 117 7. Feng, X., Gustafsson, Ö., Holmes, R.M., Vonk, J.E., van Dongen, B.E., Semiletov, I.P.,
- 118 Dudarev, O.V., Yunker, M.B., Macdonald, R.W., Wacker, L., Montluçon, D.B., Eglinton, T.I.
- 119 Multimolecular tracers of terrestrial carbon transfer across the pan-Arctic:  $^{14}\text{C}$  characteristics
- 120 of sedimentary carbon components and their environmental controls. *Glob. Biogeochem. Cy.*
- 121 **29**, 1855–1873 (2015).
- 122 8. Freymond, C.V., Lupker M., Peterse F., Haghypour N., Wäcker L., Filip F., Giosan L., Eglinton
- 123 T.I.: Constraining Instantaneous Fluxes and Integrated Compositions of Fluvially Discharged
- 124 Organic Matter. *Geochem. Geophys., Geosyst.* **19**, 2453–2462 (2018).
- 125 9. Kusch, S., Rethemeyer, J., Schefuss, E., Mollenhauer, G. Controls on the age of vascular plant
- 126 biomarkers in Black Sea sediments. *Geochim. Cosmochim. Ac.* **74**, 7031–7047 (2010).
- 127 10. McIntosh, H.A., McNichol, A.P., Xu, L., Canuel, E.A. Source-age dynamics of estuarine
- 128 particulate organic matter using fatty acid  $\delta^{13}\text{C}$  and  $\Delta^{14}\text{C}$  composition. *Limnol. Oceanogr.* **60**,
- 129 611–628 (2015).
- 130 11. Drenzek, N.J., Hughen, K.A., Montluçon, D.B., Southon, J.R., dos Santos, G.M., Druffel,
- 131 E.R.M., Giosan, L., Eglinton, T.I. A new look at old carbon in active margin sediments.
- 132 *Geology* **37**, 239–242 (2009).
- 133 12. Wakeham, S.G., Canuel, E.A., Lerberg, E.J., Mason, P., Sampere, T., Bianchi, T.S.
- 134 Partitioning of organic matter in continental margin sediments among density fractions. *Mar.*
- 135 *Chem.* **115**, 211–225 (2009).
- 136 13. Feng, X., Vonk, J.E., van Dongen, B.E., Gustafsson, Ö., Semiletov, I.P., Dudarev, O.V., Wang,
- 137 Z., Montluçon, D.B., Wacker, L., Eglinton, T.I. Differential mobilization of terrestrial carbon
- 138 pools in Eurasian Arctic river basins. *Proc. Natl. Acad. Sci.* **110**, 14168–14173 (2013).
- 139 14. Gustafsson, Ö., van Dongen, B.E., Vonk, J.E., Dudarev, O.V., Semiletov, I.P. Widespread
- 140 release of old carbon across the Siberian Arctic echoed by its large rivers. *Biogeosci.* **8**, 1737–
- 141 1743 (2011).
- 142 15. Drenzek, N.J., Montluçon, D.B., Yunker, M.B., Macdonald, R.W., Eglinton, T.I. Constraints
- 143 on the Origin of Sedimentary Organic Carbon in the Beaufort Sea from Coupled Molecular
- 144  $^{13}\text{C}$  and  $^{14}\text{C}$  Measurements. *Mar. Chem.*, **103**, 146–162 (2007).

- 145 16. Martin, E.E., Ingalls, A.E., Richey, J.E., Keil R.G., Santos G.M., Truxal L.T., Alin, S.R.,  
146 Druffel E.R.M. Age of riverine carbon suggests rapid export of terrestrial primary production  
147 in tropics. *Geophys. Res. Lett.* **40**, 5687-5691 (2013).
- 148 17. Hanke, U.M., Lima-Braun, A.L., Eglinton, T.I., Donnelly, J.P., Galy, V., Poussart, P., Hughen,  
149 K., McNichol, A.P., Xu, L., Reddy, C.M. Significance of Perylene for Source Allocation of  
150 Terrigenous Organic Matter in Aquatic Sediments. *Environ. Sci. Technol.* **53**, 8244-8251  
151 (2019).
- 152 18. Tao, S., Eglinton, T.I., Montluçon, D.B., McIntyre, C., Zhao, M. Pre-aged soil organic carbon  
153 as a major component of the Yellow river suspended load: Regional significance and global  
154 relevance. *Earth Planet. Sci. Lett.* **414**, 77–86 (2015).
- 155 19. Yu, M., Eglinton, T.I., Haghypour, N., Montlucon, D., Wacker, L., Hou, P., Zhang, H., Zhao  
156 M. Impacts of natural and human-induced hydrological variability on particulate organic  
157 carbon dynamics in the Yellow River. *Environ. Sci. Technol.* **53**, 1119-1129 (2019).
- 158

Table S1. Average bulk POC, fatty acid, and lignin <sup>14</sup>C ages and δ<sup>13</sup>C values for all river basins used in this study, including information on sample type (suspended sediment, bedload, or deposit sediment), collection year, GPS coordinates, and original data source.

| River                            | Sample Type                       | Collection yr | Deposition yr | Longitude<br>° E | Latitude<br>° N | bulk POC                    |        |                         |                            |    | n-alkanoic ("fatty") acids  |        |                         |                            |                              | lignin phenols |              |        |                         |                            | Data source/SI Ref.# |                              |                    |
|----------------------------------|-----------------------------------|---------------|---------------|------------------|-----------------|-----------------------------|--------|-------------------------|----------------------------|----|-----------------------------|--------|-------------------------|----------------------------|------------------------------|----------------|--------------|--------|-------------------------|----------------------------|----------------------|------------------------------|--------------------|
|                                  |                                   |               |               |                  |                 | δ <sup>13</sup> C<br>‰ VPDB | Fm     | Δ <sup>14</sup> C†<br>‰ | <sup>14</sup> C age‡<br>yr | n  | δ <sup>13</sup> C<br>‰ VPDB | Fm     | Δ <sup>14</sup> C†<br>‰ | <sup>14</sup> C age‡<br>yr | Conc.<br>μg gC <sup>-1</sup> | n              | C#           | Fm     | Δ <sup>14</sup> C†<br>‰ | <sup>14</sup> C age‡<br>yr |                      | Conc.<br>μg gC <sup>-1</sup> | n                  |
| Amazon @ Obidos                  | Suspended sed.                    | 2005          | 2005          | -55.508          | -1.935          | -28.5                       | 0.7136 | -291.1                  | 2710                       | 1  | -36.3                       | 0.8266 | -178.9                  | 1530                       | 857.3                        | 1              | 24-30        |        |                         |                            |                      |                              | This study         |
| Brahmaputra @ Jamuna Bridge      | Bedload                           | 2004          | 2004          | 89.730           | 24.470          | -23.1                       | 0.5776 | -426.2                  | 4409                       | 1  | -28.8                       | 0.9173 | -88.7                   | 693                        | 207.4                        | 1              | 24-32        | 0.9617 | -51.6                   | 373                        | 9215.6               | 1                            | Ref. 4; this study |
| Brahmaputra @ Jamuna Bridge      | Suspended sed.                    | 2007          | 2007          | 89.800           | 24.410          | -23.7                       | 0.6445 | -359.9                  | 3528                       | 1  | -30.4                       | 0.8760 | -130.1                  | 1064                       | 168.3                        | 1              | 24-32        |        |                         |                            |                      |                              | Ref. 4; this study |
| Cagayan @ mouth                  | Floodplain deposit                | 2016          | 2016          | 121.673          | 18.123          | -25.1                       | 0.9419 | -65.6                   | 481                        | 1  | -25.1                       | 0.9911 | -16.7                   | 71                         | 8051.6                       | 1              | 24,26,30     |        |                         |                            |                      |                              | This study         |
| Caricao (composite) @ mouth      | Slope deposit                     |               | BS average*   |                  |                 | -19.8                       | 1.0024 | -6.1                    | 0                          | 5  | -27.7                       | 0.7896 | -217.0                  | 1897                       |                              | 5              | 30,32        |        |                         |                            |                      | Ref. 5                       |                    |
| Columbia @ Portland              | Shelf deposit                     | 1993          |               | -124.254         | 45.252          | -25.3                       | 0.8400 | -164.4                  | 1406                       | 2  | -31.4                       | 0.8876 | -117.0                  | 971                        | 150.0                        | 2              | 26-32        | 0.8946 | -116.6                  | 955                        | 56000.0              | 2                            | Ref. 6             |
| Colville @ Nuiqsut               | Suspended sed.                    | 2007          | 2007          | 150.980          | 70.220          | -26.6                       | 0.4338 | -569.1                  | 6773                       | 2  | -32.4                       | 0.4108 | -592.1                  | 7163                       | 454.6                        | 2              | 24-28        | 0.8295 | -182.3                  | 1562                       | 2142.1               | 2                            | Ref. 7             |
| Congo @ Boma                     | Floodplain deposit                | 1976          |               | 12.567           | -6.050          | -26.4                       | 1.2593 | 251.0                   | 0                          | 1  | -32.4                       | 1.0316 | 28.4                    | 0                          | 2641.7                       | 1              | 24-30        | 1.1050 | 101.5                   | 0                          |                      | 1                            | This study         |
| Congo @ Brazzaville              | Suspended sed.                    | 2011-2013     | 2011-2013     | 12.567           | -6.050          | -26.4                       | 0.9059 | -100.8                  | 794                        | 1  | -31.5                       | 0.9097 | -86.8                   | 670                        | 1129.9                       | 1              | 24-32        |        |                         |                            |                      |                              | This study         |
| Connecticut @ Lyme               | Suspended sed.                    | 2010          | 2010          | -72.400          | 41.400          | -28.8                       |        |                         |                            | 1  | -33.0                       | 0.9230 | -83.7                   | 644                        | 1167.3                       | 1              | 24-32        |        |                         |                            |                      |                              | This study         |
| Danube @ Tulcea                  | Floodplain deposit                | 2013-2014     | 2013-2014     | 28.755           | 45.216          | -26.7                       | 0.7740 | -232.0                  | 2058                       | 2  | -33.3                       | 0.7861 | -220.0                  | 1934                       | 477.6                        | 2              | 24,30        |        |                         |                            |                      |                              | Ref. 8             |
| Danube @ Tulcea                  | Suspended sed. (depth integrated) | 2013-2014     | 2013-2014     | 28.755           | 45.216          | -27.8                       | 0.9236 | -83.5                   | 638                        | 2  | -33.2                       | 0.8682 | -138.5                  | 1135                       |                              | 2              | 24,30        |        |                         |                            |                      |                              | Ref. 8             |
| Danube @ Tulcea                  | Delta lake sed.                   |               |               | 28.628           | 45.218          | -27.6                       | 0.8532 | -153.3                  | 1276                       | 1  | -31.8                       | 0.9117 | -95.2                   | 742                        | 1824.6                       | 1              | 24-32        |        |                         |                            |                      |                              | This study         |
| Danube @ Tulcea                  | Shelf deposit                     | 2008          |               | 29.778           | 45.078          | -25.5                       | 0.8427 | -163.2                  | 1375                       | 2  | -29.7                       | 0.7342 | -270.9                  | 2527                       |                              | 2              | 26-30        |        |                         |                            |                      |                              | Ref. 9             |
| Delaware @ state border          | Suspended sed.                    | 2011          | 2011          | -75.553          | 39.577          | -25.1                       |        |                         |                            | 1  | -29.4                       | 0.8276 | -178.5                  | 1520                       |                              | 1              | 24-28        |        |                         |                            |                      |                              | Ref. 10            |
| Dulnain @ Dulnain Bridge         | Suspended sed.                    | 2016          | 2016          | -3.699           | 57.302          | -28.2                       | 0.9015 | -105.6                  | 833                        | 1  | -31.2                       | 0.7812 | -225.0                  | 1983                       | 19552.2                      | 1              | 24-32        |        |                         |                            |                      |                              | This study         |
| Earn @ Bridge of Earn            | Suspended sed.                    | 2016          | 2016          | -3.403           | 56.350          | -28.9                       | 0.8794 | -127.5                  | 1032                       | 1  | -32.0                       | 0.8641 | -142.7                  | 1173                       |                              | 1              | 24-32        |        |                         |                            |                      |                              | This study         |
| Eel @ mouth                      | Shelf deposit                     | 2000          |               | -124.252         | 40.648          | -24.6                       | 0.4697 | -533.7                  | 6074                       | 2  | -31.0                       | 0.8889 | -117.5                  | 947                        | 454.2                        | 2              | 24-32; 24-30 |        |                         |                            |                      |                              | Ref. 11; Ref. 12   |
| Fraser @ Hope                    | Floodplain deposit (<63μm)        | 2010          | 2010          | -121.451         | 49.381          | -25.5                       | 0.8509 | -155.3                  | 1297                       | 1  | -31.0                       | 0.6330 | -371.5                  | 3673                       | 771.0                        | 1              | 24-32        |        |                         |                            |                      |                              | This study         |
| Fraser @ Hope                    | Fjord basin                       | 2003          | BS average*   |                  |                 | -25.5                       | 0.8536 | -151.9                  | 1272                       | 8  | -30.6                       | 0.7011 | -303.6                  | 2852                       |                              | 8              | 26-32        |        |                         |                            |                      |                              | Ref. 5             |
| Ganga @ Harding Bridge           | Suspended sed.                    | 2007          | 2007          | 89.030           | 24.050          | -21.7                       | 0.7814 | -224.0                  | 1981                       | 1  | -27.8                       | 1.0111 | 4.2                     | 0                          | 405.4                        | 1              | 24-32        | 0.9462 | -67.2                   | 504                        | 7318.5               | 1                            | Ref. 4; this study |
| Ganga @ Harding Bridge           | Bedload                           | 2005          | 2005          | 89.040           | 24.040          | -22.3                       | 0.6171 | -387.0                  | 3878                       | 1  | -29.2                       | 0.8971 | -108.8                  | 872                        | 448.2                        | 1              | 24-32        |        |                         |                            |                      |                              | Ref. 4; this study |
| Gaoqing @ mouth                  | Floodplain deposit                | 2017          |               | 120.416          | 22.498          | -21.7                       | 0.7766 | -229.7                  | 2031                       | 1  | -26.0                       | 0.9087 | -98.6                   | 769                        |                              | 1              | 26-30        |        |                         |                            |                      |                              | This study         |
| Godavari @ Rajahmudi             | Slope deposit                     |               |               | 82.683           | 16.593          | -19.2                       | 0.8793 | -127.1                  | 1034                       | 1  | -26.0                       | 0.9056 | -101.0                  | 797                        | 135.5                        | 1              | 24-32        |        |                         |                            |                      |                              | This study         |
| Indigirka @ mouth                | Shelf deposit                     | 2004-2005     | 1984-2004     | 150.460          | 72.060          | -26.6                       | 0.4765 | -526.6                  | 5955                       | 1  | -30.3                       | 0.3095 | -692.6                  | 9422                       | 346.8                        | 1              | 24-28        | 0.5993 | -409.0                  | 4172                       | 21374.0              | 1                            | Ref. 13; Ref. 14   |
| Kalis @ mouth                    | Shelf deposit                     | 2004-2005     | 1984-2004     | 23.200           | 65.440          | -27.1                       | 0.9329 | -73.2                   | 558                        | 1  | -32.1                       | 0.4042 | -598.4                  | 7276                       | 282.5                        | 1              | 24-28        | 0.9728 | -40.6                   | 281                        | 14352.0              | 1                            | Ref. 13; Ref. 14   |
| Kolyma @ mouth                   | Shelf deposit                     | 2004-2005     | 1984-2004     | 163.700          | 70.000          | -26.7                       | 0.5017 | -501.6                  | 5541                       | 1  | -32.9                       | 0.4718 | -531.3                  | 6035                       | 546.4                        | 1              | 24-28        | 0.6152 | -393.3                  | 3961                       | 22776.5              | 1                            | Ref. 13; Ref. 14   |
| Lena @ mouth                     | Shelf deposit                     | 2004-2005     | 1984-2004     | 129.540          | 71.960          | -25.0                       | 0.3939 | -608.7                  | 7484                       | 1  | -24.0                       | 0.5040 | -499.3                  | 5504                       | 178.2                        | 1              | 24-28        | 0.5508 | -456.9                  | 4851                       | 11408.9              | 1                            | Ref. 13; Ref. 14   |
| Mackenzie @ Peel @ Tsiigehtichic | Shelf sediment                    | 1987          | 1987          | -133.433         | 70.170          | -26.0                       | 0.2640 | -737.2                  | 10700                      | 1  | -31.0                       | 0.4699 | -532.2                  | 6067                       | 300.0                        | 1              | 24-28        | 0.6052 | -401.9                  | 4093                       | 4322.1               | 1                            | Ref. 7; Ref. 15    |
| Mackenzie @ Peel @ Tsiigehtichic | Delta lake sed.                   | 2007          | BS average*   |                  |                 | -26.4                       | 0.2184 | -783.3                  | 12259                      | 12 |                             | 0.4879 | -515.5                  | 5765                       |                              | 18             | 24-32        |        |                         |                            |                      |                              | Ref. 5             |
| Mekong @ Phnom Penh              | Suspended sed. (<63μm)            | 2008-2010     | 2008-2010     | 104.943          | 11.596          | -26.6                       | 0.8650 | -141.0                  | 1165                       | 3  |                             |        |                         |                            |                              |                |              | 1.0953 | 80.0                    | 0                          | 18700.0              | 3                            | Ref. 16            |
| Mississippi @ mouth              | Upper slope deposit               |               |               |                  |                 | -21.5                       | 0.7765 | -228.8                  | 2032                       | 1  | -29.2                       | 0.8119 | -193.6                  | 1674                       |                              | 1              | 24-28        |        |                         |                            |                      |                              | This study         |
| Mississippi @ mouth              | Bedload                           | 2003          | 2003          | -89.507          | 29.262          | -23.6                       | 0.8252 | -180.1                  | 1544                       | 1  | -30.7                       | 0.9160 | -89.9                   | 705                        |                              | 1              | 24-30        |        |                         |                            |                      |                              | Ref. 12            |
| Ob @ mouth                       | Floodplain lake sed.              | 1994          |               | 68.542           | 66.667          | -29.4                       | 0.8437 | -160.7                  | 1380                       | 2  | -33.1                       | 0.7001 | -303.7                  | 2865                       | 4814.4                       | 2              | 24-32        |        |                         |                            |                      |                              | This study         |
| Ob @ mouth                       | Shelf deposit                     | 2004-2005     | 20 years      | 73.440           | 72.650          | -27.4                       | 0.6911 | -313.4                  | 2968                       | 1  | -32.1                       | 0.2833 | -718.6                  | 10133                      | 169.6                        | 1              | 24-28        | 0.5765 | -431.5                  | 4484                       | 13361.0              | 1                            | Ref. 13; Ref. 14   |
| Padma @ Mawa                     | Suspended sed.                    | 2007          |               | 90.250           | 23.460          | -22.9                       | 0.6639 | -340.7                  | 3291                       | 1  | -29.4                       | 0.9606 | -46.0                   | 323                        | 519.2                        | 1              | 24-32        |        |                         |                            |                      |                              | Ref. 4; this study |
| Pearl @ Guangzhou                | Suspended sed.                    | 2018          |               | 113.490          | 23.090          | -27.8                       | 0.7567 | -249.6                  | 2240                       | 3  |                             | 0.8619 | -145.3                  | 1194                       | 984.2                        | 3              | 24-30        |        |                         |                            |                      |                              | This study         |
| Pettanquanscutt @ Narragansett   | Estuarine deposit                 |               | BS average*   |                  |                 | -23.8                       | 0.9376 | -70.3                   | 518                        | 4  | -30.1                       | 0.7641 | -242.4                  | 2162                       |                              | 4              | 30,32        |        |                         |                            |                      |                              | Ref. 17            |
| Tay @ Earn confluence            | Suspended sed.                    | 2016          | 2016          | -3.246           | 56.353          | -28.1                       | 0.8865 | -120.5                  | 968                        | 1  |                             | 0.8331 | -173.5                  | 1467                       |                              | 1              | 24-32        |        |                         |                            |                      |                              | This study         |
| Unare @ mouth                    | Floodplain deposit                |               |               |                  |                 | -25.0                       | 0.7975 | -209.2                  | 1818                       | 1  |                             | 0.9411 | -66.8                   | 488                        | 471.3                        | 1              | 24-32        |        |                         |                            |                      |                              | This study         |
| Waipuu @ Rautoria                | Shelf deposit                     |               |               | 178.386          | -37.815         | -24.1                       | 0.4882 | -515.9                  | 5760                       | 1  |                             | 0.5476 | -457.0                  | 4838                       | 319.2                        | 1              | 24-32        |        |                         |                            |                      |                              | This study         |
| Yangtze @ Zhenjiang              | Suspended sed.                    | 2007-2009     | 2007-2009     | 120.930          | 31.780          | -25.1                       | 0.7018 | -303.3                  | 2864                       | 3  |                             | 0.7921 | -213.5                  | 1879                       | 1475.5                       | 2              | 24-32        | 0.9453 | -68.2                   | 452                        |                      | 3                            | This study         |
| Yellow @ Binzhou                 | Suspended sed.                    | 2011-2016     | 2011-2016     |                  |                 | -23.9                       | 0.5917 | -413.3                  | 4216                       | 18 | -31.5                       | 0.8172 | -189.3                  | 1622                       | 288.2                        | 18             | 24-32        | 0.9641 | -51.1                   | 353                        |                      | 5                            | Ref. 18; Ref. 19   |
| Yenisey @ mouth                  | Shelf deposit                     |               |               | 79.860           | 72.610          | -26.5                       | 0.8311 | -175.9                  | 1486                       | 1  | -32.1                       | 0.4788 | -525.2                  | 5916                       | 159.9                        | 1              | 24-28        | 0.7755 | -236.7                  | 2102                       | 11151.7              | 1                            | Ref. 13; Ref. 14   |
| Yukon @ mouth                    | Floodplain deposit                | 2007          | 2007          |                  |                 | -26.7                       | 0.5989 | -405.2                  | 4118                       | 1  |                             | 0.6502 | -354.3                  | 3458                       | 726.9                        | 1              | 24-28        | 0.7313 | -279.1                  | 2574                       | 7506.6               | 1                            | Ref. 7             |

\*Indicates that deposit samples likely integrate across the nuclear-bomb-derived <sup>14</sup>C spike (~1955 – present).

†Calculated as Δ<sup>14</sup>C = [Fm\*exp((1950 – collection year)/8267) - 1]\*1000 ‰; for samples with unknown collection year, 2020 was used.

‡Samples with Fm > 1.0 are designated as <sup>14</sup>C age = 0 yr for all statistical analyses.



|                     |                    |       |      |         |        |       |        |        |      |       |        |        |      |       |       |        |        |      |         |                  |
|---------------------|--------------------|-------|------|---------|--------|-------|--------|--------|------|-------|--------|--------|------|-------|-------|--------|--------|------|---------|------------------|
| Yangzte @ Zhenjiang | Suspended sed.     | 2009  | 2009 | 120.930 | 31.780 | -25.5 | 0.7729 | -232.6 | 2069 |       | 0.7584 | -247.0 | 2221 | 694.7 | 24-32 | 0.8179 | -193.9 | 1674 |         | This study       |
| Yellow @ Binzhou    | Suspended sed.     | 40722 |      |         |        | -23.8 | 0.5859 | -418.6 | 4294 | -31.0 | 0.8529 | -153.7 | 1278 |       | 24-32 | 0.9688 | -38.7  | 255  |         | Ref. 18          |
| Yellow @ Binzhou    | Suspended sed.     | 40808 |      |         |        | -24.2 | 0.5893 | -415.2 | 4248 | -31.2 | 0.8430 | -163.5 | 1372 |       | 24-32 | 0.9973 | -10.4  | 22   |         | Ref. 18          |
| Yellow @ Binzhou    | Suspended sed.     | 40864 |      |         |        | -24.0 | 0.6043 | -400.3 | 4046 | -31.3 | 0.8149 | -191.4 | 1645 |       | 24-32 |        |        |      |         | Ref. 18          |
| Yellow @ Binzhou    | Suspended sed.     | 40921 |      |         |        | -23.9 | 0.5963 | -408.3 | 4154 | -31.0 | 0.8201 | -186.2 | 1593 |       | 24-32 | 0.8792 | -127.6 | 1034 |         | Ref. 18          |
| Yellow @ Binzhou    | Suspended sed.     | 41021 |      |         |        | -24.2 | 0.5613 | -443.0 | 4639 | -31.3 | 0.7862 | -219.9 | 1933 |       | 24-32 |        |        |      |         | Ref. 18          |
| Yellow @ Binzhou    | Suspended sed.     | 41079 |      |         |        | -24.0 | 0.6075 | -397.2 | 4004 | -31.1 | 0.8209 | -185.4 | 1585 |       | 24-32 | 0.8982 | -108.8 | 863  |         | Ref. 18          |
| Yellow @ Binzhou    | Suspended sed.     | 41087 |      |         |        | -23.8 | 0.5686 | -435.8 | 4535 | -31.2 | 0.7893 | -216.8 | 1901 |       | 24-32 | 1.0097 | 1.9    | 0    |         | Ref. 18          |
| Yellow @ Binzhou    | Suspended sed.     | 41195 |      |         |        | -23.5 | 0.5581 | -446.2 | 4685 | -30.7 | 0.7837 | -222.3 | 1958 |       | 24-32 |        |        |      |         | Ref. 18          |
| Yellow @ Binzhou    | Suspended sed.     | 41278 |      |         |        | -23.6 | 0.5688 | -435.6 | 4532 | -30.5 | 0.7879 | -218.1 | 1914 |       | 24-32 |        |        |      |         | Ref. 18          |
| Yellow @ Binzhou    | Suspended sed.     | 41392 |      |         |        | -23.7 | 0.5915 | -413.1 | 4218 | -31.1 | 0.8442 | -162.3 | 1360 |       | 24-32 |        |        |      |         | Ref. 18          |
| Yellow @ Binzhou    | Suspended sed.     | 41444 |      |         |        | -23.4 | 0.5758 | -428.7 | 4435 | -30.6 | 0.8064 | -199.9 | 1729 |       | 24-32 |        |        |      |         | Ref. 18          |
| Yellow @ Binzhou    | Suspended sed.     | 41459 |      |         |        | -23.5 | 0.5578 | -446.5 | 4690 | -30.7 | 0.8177 | -188.6 | 1617 |       | 24-32 |        |        |      |         | Ref. 18          |
| Yellow @ Binzhou    | Suspended sed.     | 42159 |      |         |        | -23.3 | 0.5923 | -412.5 | 4207 | -32.3 | 0.7919 | -214.5 | 1874 |       | 24-32 |        |        |      |         | Ref. 19          |
| Yellow @ Binzhou    | Suspended sed.     | 42194 |      |         |        | -23.9 | 0.5963 | -408.5 | 4153 | -32.5 | 0.8719 | -135.1 | 1101 |       | 24-32 |        |        |      |         | Ref. 19          |
| Yellow @ Binzhou    | Suspended sed.     | 42220 |      |         |        | -23.5 | 0.6547 | -350.6 | 3403 | -32.2 | 0.8611 | -145.8 | 1201 |       | 24-32 |        |        |      |         | Ref. 19          |
| Yellow @ Binzhou    | Suspended sed.     | 42332 |      |         |        | -24.3 | 0.5759 | -428.7 | 4433 | -33.3 | 0.7821 | -224.2 | 1975 |       | 24-32 |        |        |      |         | Ref. 19          |
| Yellow @ Binzhou    | Suspended sed.     | 42390 |      |         |        | -24.3 | 0.5650 | -439.6 | 4586 | -31.8 | 0.8121 | -194.5 | 1672 |       | 24-32 |        |        |      |         | Ref. 19          |
| Yellow @ Binzhou    | Suspended sed.     | 42497 |      |         |        | -24.9 | 0.7018 | -303.8 | 2844 | -33.1 | 0.8216 | -185.1 | 1579 |       | 24-32 |        |        |      |         | Ref. 19          |
| Yenisey @ mouth     | Shelf deposit      |       |      | 79.860  | 72.610 | -26.5 | 0.8311 | -175.9 | 1486 | -32.1 | 0.4788 | -525.2 | 5916 | 159.9 | 24-28 | 0.7755 | -236.7 | 2102 | 11151.7 | Ref. 13; Ref. 14 |
| Yukon @ mouth       | Floodplain deposit | 2007  | 2007 |         |        | -26.7 | 0.5989 | -405.2 | 4118 |       | 0.6502 | -354.3 | 3458 | 726.9 | 24-28 | 0.7313 | -279.1 | 2574 | 7506.6  | Ref. 7           |

\*Indicates that deposit samples likely integrate across the nuclear-bomb-derived <sup>14</sup>C spike (~1955 – present).

†Calculated as  $\Delta 14C = [Fm \cdot \exp((1950 - \text{collection year})/8267) - 1] \cdot 1000$  ‰; for samples with unknown collection year, 2020 was used.

‡Samples with Fm > 1.0 are designated as <sup>14</sup>C age = 0 yr for all statistical analyses.

Table S3. All environmental and geomorphic control variables, including spatially resolved variables at various e-folding distances as well as notes on data sources.

weighting e-folding distance = 50,000 km

| River                            | Longitude<br>° E | Latitude<br>° N | Area<br>km <sup>2</sup> | Runoff†<br>cm yr <sup>-1</sup> | TSS Yield‡<br>t km <sup>-2</sup> yr <sup>-1</sup> | POC Yield‡<br>tC km <sup>-2</sup> yr <sup>-1</sup> | Permafrost cover |    | Elevation§<br>m | Slope§<br>% rise | floodplain§<br>fractional | MAT¶<br>Kelvin | T CV¶<br>unitless | MAP¶<br>cm yr <sup>-1</sup> | P CV¶<br>unitless | C <sub>soil</sub> ⊖<br>tC km <sup>-2</sup> | NPP**<br>tC km <sup>-2</sup> yr <sup>-1</sup> | τ <sub>ecosystem</sub> ⊖<br>yr | τ <sub>soil</sub> **<br>yr | anthro.  <br>fractional |
|----------------------------------|------------------|-----------------|-------------------------|--------------------------------|---------------------------------------------------|----------------------------------------------------|------------------|----|-----------------|------------------|---------------------------|----------------|-------------------|-----------------------------|-------------------|--------------------------------------------|-----------------------------------------------|--------------------------------|----------------------------|-------------------------|
| Amazon @ Obidos                  | -55.508          | -1.935          | 6.1E+06                 | 102.7                          | 194.6                                             | 1.9                                                | 0                | 0  | 469             | 2.7              | 0.70                      | 297.9          | 0.003             | 183.3                       | 0.469             | 23078.8                                    | 308.4                                         | 13.408                         | 17.948                     | 0.06                    |
| Brahmaputra @ Jamuna Bridge      | 89.730           | 24.470          | 6.1E+05                 | 99.9                           | 1032.8                                            | 2.9                                                | 0                | 0  | 3143            | 15.2             | 0.16                      | 280.9          | 0.021             | 94.8                        | 0.959             | 10975.4                                    | 121.0                                         | 79.936                         | 54.773                     | 0.12                    |
| Cagayan @ mouth                  | 121.673          | 18.123          | 2.7E+04                 | 185.3                          |                                                   |                                                    | 0                | 0  | 531             | 8.3              | 0.18                      | 297.0          | 0.005             | 217.1                       | 0.635             | 15556.0                                    | 265.5                                         | 10.783                         | 12.959                     | 0.90                    |
| Cariaco (composite) @ mouth      | -65.187          | 10.089          | 3.5E+04                 | 17.8                           | 8.9                                               | 0.2                                                | 0                | 0  | 136             | 1.0              | 0.76                      | 299.7          | 0.002             | 82.7                        | 0.798             | 19119.6                                    | 194.9                                         | 11.361                         | 15.666                     | 0.14                    |
| Columbia @ Portland              | -123.991         | 46.245          | 6.7E+05                 | 35.3                           | 11.4                                              | 0.1                                                | 0                | 0  | 1324            | 9.7              | 0.09                      | 278.9          | 0.029             | 52.8                        | 0.377             | 20769.4                                    | 90.4                                          | 42.401                         | 67.415                     | 0.09                    |
| Colville @ Nuiqsut               | -150.913         | 70.174          | 6.0E+04                 | 31.3                           | 99.3                                              | 2.6                                                | 100              | 0  | 567             | 5.1              | 0.15                      | 262.2          | 0.055             | 19.2                        | 0.618             | 36293.8                                    | 51.4                                          | 118.586                        | 181.691                    | 0.00                    |
| Congo @ Boma                     | 12.567           | -6.050          | 3.7E+06                 | 34.6                           | 8.8                                               | 0.5                                                | 0                | 0  | 729             | 1.6              | 0.46                      | 296.9          | 0.003             | 125.8                       | 0.614             | 18604.4                                    | 280.6                                         | 13.060                         | 15.212                     | 0.11                    |
| Congo @ Brazzaville              | 15.289           | -4.289          | 3.7E+06                 | 34.6                           | 8.8                                               | 0.5                                                | 0                | 0  | 733             | 1.6              | 0.47                      | 297.0          | 0.003             | 126.2                       | 0.610             | 18597.0                                    | 282.4                                         | 13.076                         | 15.054                     | 0.11                    |
| Connecticut @ Lyme               | -72.394          | 41.388          | 2.7E+04                 | 64.1                           | 9.4                                               | 0.5                                                | 0                | 0  | 352             | 4.6              | 0.04                      | 279.5          | 0.036             | 93.1                        | 0.109             | 26195.4                                    | 245.9                                         | 24.628                         | 27.648                     | 0.02                    |
| Danube @ Tulcea                  | 28.628           | 45.218          | 8.0E+05                 | 25.3                           | 84.1                                              | 1.2                                                | 0                | 0  | 460             | 5.0              | 0.28                      | 282.0          | 0.028             | 64.6                        | 0.298             | 18148.4                                    | 145.1                                         | 18.154                         | 30.292                     | 0.65                    |
| Delaware @ state border          | -75.553          | 39.577          | 2.2E+04                 | 78.9                           | 31.0                                              | 0.3                                                | 0                | 0  | 295             | 2.8              | 0.23                      | 282.5          | 0.033             | 94.3                        | 0.128             | 12603.3                                    | 203.7                                         | 12.665                         | 20.114                     | 0.23                    |
| Dul @ Dulnain Bridge             | -3.699           | 57.302          | 3.1E+02                 | 61.0                           |                                                   |                                                    | 0                | 0  | 454             | 4.9              | 0.00                      | 278.5          | 0.016             | 101.0                       | 0.217             | 39385.8                                    | 123.2                                         | 34.927                         | 101.152                    | 0.80                    |
| Earn @ Bridge of Earn            | -3.403           | 56.350          | 7.8E+02                 | 116.2                          | 76.8                                              | 0.9                                                | 0                | 0  | 243             | 7.3              | 0.00                      | 280.9          | 0.016             | 92.7                        | 0.227             | 21816.9                                    | 117.8                                         | 16.286                         | 68.715                     | 0.88                    |
| Eel @ mouth                      | -124.263         | 40.625          | 8.1E+03                 | 88.6                           | 1983.2                                            | 12.2                                               | 0                | 0  | 768             | 11.7             | 0.01                      | 283.9          | 0.014             | 103.6                       | 0.871             | 29865.7                                    | 225.2                                         | 25.515                         | 29.270                     | 0.01                    |
| Fraser @ Hope                    | -121.451         | 49.381          | 2.3E+05                 | 48.9                           | 507.2                                             | 0.6                                                | 0                | 0  | 1201            | 10.5             | 0.06                      | 275.4          | 0.030             | 61.4                        | 0.265             | 17426.4                                    | 115.9                                         | 34.674                         | 43.286                     | 0.01                    |
| Ganga @ Harding Bridge           | 89.032           | 24.040          | 1.0E+06                 | 47.4                           | 70.6                                              | 1.6                                                | 0                | 0  | 853             | 5.2              | 0.64                      | 294.7          | 0.020             | 88.6                        | 1.267             | 14203.3                                    | 86.7                                          | 45.710                         | 36.463                     | 0.78                    |
| Goaping @ mouth                  | 120.416          | 22.498          | 3.3E+03                 | 248.6                          | 6449.6                                            | 17.4                                               | 0                | 0  | 1131            | 17.9             | 0.13                      | 295.0          | 0.012             | 168.5                       | 0.848             | 14244.5                                    | 241.8                                         | 11.560                         | 15.999                     | 0.90                    |
| Godavari @ Rajahmudi             | 81.755           | 16.949          | 3.1E+05                 | 38.4                           | 543.9                                             | 2.4                                                | 0                | 0  | 432             | 1.6              | 0.58                      | 299.8          | 0.013             | 92.5                        | 1.203             | 19361.9                                    | 106.4                                         | 25.958                         | 31.178                     | 0.68                    |
| Indigirka @ mouth                | 148.894          | 70.813          | 3.4E+05                 | 14.7                           | 32.5                                              | 0.5                                                | 100              | 0  | 620             | 5.7              | 0.28                      | 257.2          | 0.078             | 23.8                        | 0.756             | 24074.5                                    | 41.9                                          | 75.828                         | 147.698                    | 0.00                    |
| Kalix @ mouth                    | 23.183           | 65.832          | 2.1E+04                 | 41.8                           | 1.9                                               | 0.1                                                | 5                | 15 | 368             | 3.2              | 0.26                      | 271.1          | 0.038             | 40.4                        | 0.398             | 43450.0                                    | 94.7                                          | 67.783                         | 172.491                    | 0.01                    |
| Kolyma @ mouth                   | 161.302          | 68.790          | 6.5E+05                 | 20.2                           | 15.5                                              | 0.5                                                | 100              | 0  | 434             | 4.8              | 0.26                      | 260.1          | 0.070             | 23.1                        | 0.575             | 28649.5                                    | 51.3                                          | 76.099                         | 175.406                    | 0.00                    |
| Lena @ mouth                     | 127.158          | 71.874          | 2.4E+06                 | 21.7                           | 8.5                                               | 0.5                                                | 79               | 20 | 562             | 4.9              | 0.18                      | 263.4          | 0.073             | 31.9                        | 0.695             | 20741.4                                    | 91.4                                          | 47.421                         | 72.464                     | 0.01                    |
| Mackenzie + Peel @ Tsiigehtchie* | -134.769         | 68.924          | 5.0E+05                 | 17.9                           | 248.4                                             | 4.0                                                | 16               | 66 | 678             | 5.2              | 0.36                      | 267.1          | 0.055             | 30.9                        | 0.459             | 35496.1                                    | 64.6                                          | 104.517                        | 207.472                    | 0.00                    |
| Mekong @ Phnom Penh              | 104.943          | 11.596          | 7.9E+05                 | 59.3                           | 189.3                                             | 4.1                                                | 0                | 0  | 1123            | 6.8              | 0.31                      | 294.4          | 0.011             | 124.5                       | 0.857             | 16021.7                                    | 226.9                                         | 16.393                         | 22.736                     | 0.32                    |
| Mississippi @ mouth              | -89.511          | 29.355          | 3.2E+06                 | 18.0                           | 124.3                                             | 0.3                                                | 0                | 0  | 662             | 1.6              | 0.55                      | 283.4          | 0.035             | 64.2                        | 0.439             | 20510.0                                    | 110.4                                         | 31.628                         | 49.967                     | 0.47                    |
| Ob @ mouth                       | 70.686           | 66.428          | 3.0E+06                 | 13.7                           | 5.3                                               | 0.1                                                | 2                | 24 | 330             | 1.8              | 0.72                      | 273.0          | 0.050             | 36.7                        | 0.481             | 33707.8                                    | 95.0                                          | 54.747                         | 116.290                    | 0.32                    |
| Padma @ Mawa                     | 90.250           | 23.460          | 1.6E+06                 | 66.9                           | 702.4                                             | 2.2                                                | 0                | 0  | 1660            | 8.7              | 0.47                      | 289.9          | 0.020             | 91.8                        | 1.153             | 13166.1                                    | 98.7                                          | 57.973                         | 43.195                     | 0.55                    |
| Pearl @ Guangzhou                | 113.468          | 23.071          | 4.4E+05                 | 68.6                           | 181.8                                             | 1.2                                                | 0                | 0  | 657             | 6.4              | 0.09                      | 292.5          | 0.021             | 123.9                       | 0.713             | 20965.4                                    | 173.6                                         | 16.309                         | 23.152                     | 0.67                    |
| Pettaquamscutt @ Narragansett    | -71.452          | 41.453          | 3.5E+01                 |                                |                                                   |                                                    | 0                | 0  | 39              | 0.4              | 1.00                      | 282.7          | 0.032             | 100.1                       | 0.100             | 22829.2                                    | 253.8                                         | 21.018                         | 26.701                     | 0.00                    |
| Tay @ Earn confluence            | -3.246           | 56.353          | 6.5E+03                 | 92.3                           | 146.2                                             | 1.4                                                | 0                | 0  | 391             | 8.0              | 0.03                      | 279.8          | 0.016             | 96.6                        | 0.244             | 33859.7                                    | 117.8                                         | 28.448                         | 68.715                     | 0.88                    |
| Unare @ mouth                    | -65.187          | 10.089          | 2.0E+04                 | 8.9                            | 2.1                                               | 0.1                                                | 0                | 0  | 136             | 1.0              | 0.76                      | 299.7          | 0.002             | 82.7                        | 0.798             | 19119.6                                    | 194.9                                         | 11.361                         | 15.666                     | 0.14                    |
| Waiapu @ Ruatoria                | 178.480          | -37.779         | 1.4E+03                 | 200.1                          | 20319.3                                           | 116.6                                              | 0                | 0  | 566             | 9.0              | 0.00                      | 285.5          | 0.013             | 166.2                       | 0.252             | 17942.2                                    | 315.6                                         | 30.839                         | 30.839                     | 0.00                    |
| Yangtze @ Zhenjiang              | 120.930          | 31.780          | 1.8E+06                 | 48.9                           | 249.4                                             | 2.4                                                | 0                | 0  | 1633            | 9.2              | 0.15                      | 284.6          | 0.027             | 89.8                        | 0.755             | 17675.4                                    | 128.6                                         | 31.846                         | 36.730                     | 0.43                    |
| Yellow @ Binzhou                 | 118.544          | 37.612          | 7.7E+05                 | 6.3                            | 194.8                                             | 0.5                                                | 0                | 0  | 1881            | 4.8              | 0.18                      | 279.3          | 0.036             | 39.8                        | 0.971             | 14842.3                                    | 59.8                                          | 74.673                         | 74.507                     | 0.26                    |
| Yenisey @ mouth                  | 83.356           | 70.939          | 2.6E+06                 | 24.0                           | 1.8                                               | 0.1                                                | 33               | 55 | 544             | 4.4              | 0.17                      | 267.1          | 0.059             | 42.2                        | 0.509             | 19636.9                                    | 100.8                                         | 37.290                         | 73.426                     | 0.04                    |
| Yukon @ mouth                    | -163.818         | 62.400          | 8.5E+05                 | 24.2                           | 70.8                                              | 0.9                                                | 23               | 76 | 692             | 6.8              | 0.16                      | 266.9          | 0.052             | 26.2                        | 0.665             | 18835.3                                    | 71.4                                          | 46.488                         | 112.322                    | 0.00                    |

\*Mackenzie River area upstream of Great Slave Lake is omitted from spatial statistics.

†Data from Peucker-Ehrenbrink (2009).

‡Data from Galy et al. (2015).

|Data from Feng et al. (2013).

§Data from TOPO30 digital elevation model, US Geological Survey; floodplain calculated as area with slope ≤ 1 % rise.

¶Data from New et al. (2002); coefficient of variation (CV) calculated as σ / mean MAT, where σ = std. dev. of monthly average temperatures

⊖Data from Carvalhais et al. (2014).

\*\*Data from Bloom et al. (2016).

||Data from the Global Land Cover Characterization (GLCC) database; anthropogenic taken as the sum of "croplands", "urban and built-up", and "croplands/natural vegetation mosaic" (International Geosphere Biosphere Programme classification)

^Data are carbon-weighted averages for the designated depth ranges from Shi et al. (2020).



weighting e-folding distance = 10,000 km

weighting e-folding distance = 5,000 km

| Elevation§<br>m | Slope§<br>% rise | floodplain§<br>fractional | MAT¶<br>Kelvin | T CV¶<br>unitless | MAP¶<br>cm yr <sup>-1</sup> | P CV¶<br>unitless | C <sub>soil</sub> ¶<br>tC km <sup>-2</sup> | NPP**<br>tC km <sup>-2</sup> yr <sup>-1</sup> | τ <sub>ecosystem</sub> ¶<br>yr | τ <sub>soil</sub> **<br>yr | anthro.¶<br>fractional | Elevation§<br>m | Slope§<br>% rise | floodplain§<br>fractional | MAT¶<br>Kelvin | T CV¶<br>unitless | MAP¶<br>cm yr <sup>-1</sup> | P CV¶<br>unitless | C <sub>soil</sub> ¶<br>tC km <sup>-2</sup> | NPP**<br>tC km <sup>-2</sup> yr <sup>-1</sup> | τ <sub>ecosystem</sub> ¶<br>yr |
|-----------------|------------------|---------------------------|----------------|-------------------|-----------------------------|-------------------|--------------------------------------------|-----------------------------------------------|--------------------------------|----------------------------|------------------------|-----------------|------------------|---------------------------|----------------|-------------------|-----------------------------|-------------------|--------------------------------------------|-----------------------------------------------|--------------------------------|
| 432             | 2.5              | 0.71                      | 298.0          | 0.003             | 184.6                       | 0.468             | 22977.7                                    | 311.4                                         | 13.223                         | 17.373                     | 0.05                   | 391             | 2.3              | 0.72                      | 298.2          | 0.002             | 186.0                       | 0.468             | 22844.5                                    | 314.8                                         | 13.006                         |
| 3071            | 15.1             | 0.16                      | 281.3          | 0.021             | 97.9                        | 0.956             | 11140.3                                    | 124.2                                         | 77.477                         | 53.191                     | 0.13                   | 2981            | 15.0             | 0.17                      | 281.8          | 0.021             | 101.8                       | 0.952             | 11345.4                                    | 128.1                                         | 74.450                         |
| 530             | 8.3              | 0.19                      | 297.0          | 0.005             | 217.0                       | 0.635             | 15557.1                                    | 265.5                                         | 10.781                         | 12.957                     | 0.90                   | 529             | 8.2              | 0.19                      | 297.0          | 0.005             | 216.9                       | 0.636             | 15558.6                                    | 265.6                                         | 10.778                         |
| 136             | 1.0              | 0.76                      | 299.7          | 0.002             | 82.7                        | 0.798             | 19118.5                                    | 194.8                                         | 11.360                         | 15.663                     | 0.14                   | 136             | 1.0              | 0.76                      | 299.7          | 0.002             | 82.6                        | 0.798             | 19117.0                                    | 194.8                                         | 11.358                         |
| 1308            | 9.7              | 0.09                      | 279.0          | 0.029             | 53.1                        | 0.381             | 20930.3                                    | 90.6                                          | 42.461                         | 67.600                     | 0.09                   | 1288            | 9.6              | 0.09                      | 279.1          | 0.028             | 53.5                        | 0.386             | 21131.1                                    | 90.8                                          | 42.522                         |
| 564             | 5.0              | 0.15                      | 262.2          | 0.055             | 19.2                        | 0.618             | 36383.5                                    | 51.3                                          | 118.929                        | 182.115                    | 0.00                   | 561             | 5.0              | 0.15                      | 262.2          | 0.055             | 19.2                        | 0.617             | 36496.1                                    | 51.2                                          | 119.364                        |
| 713             | 1.6              | 0.46                      | 297.0          | 0.003             | 126.7                       | 0.605             | 18460.8                                    | 281.6                                         | 12.944                         | 15.054                     | 0.10                   | 694             | 1.6              | 0.46                      | 297.1          | 0.003             | 127.8                       | 0.595             | 18292.6                                    | 282.6                                         | 12.808                         |
| 717             | 1.6              | 0.47                      | 297.0          | 0.003             | 127.2                       | 0.600             | 18448.6                                    | 283.8                                         | 12.958                         | 14.869                     | 0.10                   | 699             | 1.6              | 0.47                      | 297.1          | 0.003             | 128.4                       | 0.589             | 18273.0                                    | 285.2                                         | 12.822                         |
| 350             | 4.6              | 0.04                      | 279.5          | 0.036             | 93.1                        | 0.108             | 26190.1                                    | 245.8                                         | 24.617                         | 27.643                     | 0.02                   | 349             | 4.6              | 0.04                      | 279.5          | 0.036             | 93.1                        | 0.108             | 26183.4                                    | 245.8                                         | 24.602                         |
| 453             | 5.0              | 0.29                      | 282.1          | 0.028             | 64.0                        | 0.298             | 18210.0                                    | 144.4                                         | 18.244                         | 30.510                     | 0.66                   | 444             | 4.9              | 0.29                      | 282.1          | 0.028             | 63.4                        | 0.298             | 18287.8                                    | 143.6                                         | 18.359                         |
| 293             | 2.8              | 0.23                      | 282.5          | 0.033             | 94.3                        | 0.128             | 12611.4                                    | 203.6                                         | 12.664                         | 20.117                     | 0.23                   | 290             | 2.8              | 0.24                      | 282.5          | 0.033             | 94.4                        | 0.128             | 12621.5                                    | 203.3                                         | 12.663                         |
| 453             | 4.9              | 0.00                      | 278.5          | 0.016             | 101.0                       | 0.217             | 39385.8                                    | 123.2                                         | 34.927                         | 101.152                    | 0.80                   | 453             | 4.9              | 0.00                      | 278.5          | 0.016             | 101.0                       | 0.217             | 39385.8                                    | 123.2                                         | 34.927                         |
| 243             | 7.2              | 0.00                      | 280.9          | 0.016             | 92.7                        | 0.227             | 21816.9                                    | 117.8                                         | 16.286                         | 68.715                     | 0.88                   | 243             | 7.2              | 0.00                      | 280.9          | 0.016             | 92.7                        | 0.227             | 21816.9                                    | 117.8                                         | 16.286                         |
| 766             | 11.7             | 0.01                      | 283.9          | 0.014             | 103.6                       | 0.871             | 29859.6                                    | 225.2                                         | 25.506                         | 29.293                     | 0.01                   | 765             | 11.7             | 0.01                      | 283.9          | 0.014             | 103.7                       | 0.871             | 29852.0                                    | 225.2                                         | 25.494                         |
| 1200            | 10.5             | 0.06                      | 275.4          | 0.030             | 61.1                        | 0.265             | 17457.3                                    | 115.4                                         | 34.815                         | 43.478                     | 0.01                   | 1200            | 10.4             | 0.06                      | 275.4          | 0.030             | 60.7                        | 0.266             | 17498.0                                    | 114.9                                         | 34.992                         |
| 851             | 5.2              | 0.64                      | 294.7          | 0.020             | 89.1                        | 1.264             | 14185.0                                    | 87.1                                          | 45.708                         | 36.284                     | 0.78                   | 847             | 5.2              | 0.64                      | 294.7          | 0.020             | 89.9                        | 1.260             | 14164.1                                    | 87.6                                          | 45.678                         |
| 1129            | 17.9             | 0.13                      | 295.0          | 0.012             | 168.5                       | 0.848             | 14244.5                                    | 241.8                                         | 11.560                         | 15.999                     | 0.90                   | 1127            | 17.9             | 0.13                      | 295.0          | 0.012             | 168.5                       | 0.848             | 14244.5                                    | 241.8                                         | 11.560                         |
| 430             | 1.6              | 0.58                      | 299.8          | 0.013             | 92.7                        | 1.203             | 19326.2                                    | 107.1                                         | 25.772                         | 31.033                     | 0.67                   | 427             | 1.6              | 0.58                      | 299.8          | 0.013             | 93.1                        | 1.203             | 19281.4                                    | 107.8                                         | 25.540                         |
| 599             | 5.5              | 0.29                      | 257.2          | 0.078             | 23.6                        | 0.750             | 24170.7                                    | 42.0                                          | 75.907                         | 147.483                    | 0.00                   | 573             | 5.3              | 0.30                      | 257.3          | 0.078             | 23.3                        | 0.742             | 24291.8                                    | 42.0                                          | 76.042                         |
| 367             | 3.2              | 0.26                      | 271.1          | 0.038             | 40.5                        | 0.397             | 43507.1                                    | 94.8                                          | 67.773                         | 172.235                    | 0.01                   | 365             | 3.2              | 0.26                      | 271.1          | 0.038             | 40.5                        | 0.396             | 43578.3                                    | 95.1                                          | 67.761                         |
| 421             | 4.6              | 0.27                      | 260.1          | 0.070             | 22.8                        | 0.573             | 28669.4                                    | 51.3                                          | 76.271                         | 175.978                    | 0.00                   | 404             | 4.5              | 0.29                      | 260.1          | 0.070             | 22.5                        | 0.570             | 28696.3                                    | 51.3                                          | 76.535                         |
| 544             | 4.8              | 0.18                      | 263.2          | 0.073             | 31.5                        | 0.688             | 20816.2                                    | 90.4                                          | 47.744                         | 73.277                     | 0.01                   | 521             | 4.7              | 0.20                      | 263.0          | 0.074             | 31.0                        | 0.679             | 20912.8                                    | 88.9                                          | 48.198                         |
| 670             | 5.2              | 0.37                      | 267.1          | 0.055             | 30.7                        | 0.460             | 35836.6                                    | 63.9                                          | 105.717                        | 209.588                    | 0.00                   | 660             | 5.1              | 0.37                      | 267.0          | 0.056             | 30.4                        | 0.461             | 36245.9                                    | 63.0                                          | 107.160                        |
| 1061            | 6.6              | 0.32                      | 294.8          | 0.010             | 125.8                       | 0.855             | 16114.0                                    | 230.3                                         | 16.118                         | 21.916                     | 0.33                   | 990             | 6.4              | 0.33                      | 295.2          | 0.010             | 127.3                       | 0.853             | 16214.6                                    | 234.2                                         | 15.804                         |
| 629             | 1.6              | 0.56                      | 283.6          | 0.035             | 66.2                        | 0.428             | 20514.2                                    | 114.5                                         | 30.410                         | 48.107                     | 0.47                   | 590             | 1.5              | 0.58                      | 284.0          | 0.035             | 68.6                        | 0.415             | 20492.6                                    | 119.5                                         | 28.972                         |
| 302             | 1.6              | 0.73                      | 272.8          | 0.050             | 37.1                        | 0.479             | 34529.4                                    | 95.9                                          | 54.519                         | 118.499                    | 0.31                   | 269             | 1.5              | 0.75                      | 272.7          | 0.050             | 37.6                        | 0.477             | 35468.8                                    | 96.9                                          | 54.354                         |
| 1636            | 8.7              | 0.47                      | 290.0          | 0.020             | 93.3                        | 1.149             | 13214.5                                    | 100.2                                         | 57.144                         | 42.568                     | 0.55                   | 1607            | 8.6              | 0.48                      | 290.1          | 0.020             | 95.3                        | 1.143             | 13278.1                                    | 102.1                                         | 56.087                         |
| 641             | 6.4              | 0.09                      | 292.6          | 0.021             | 124.6                       | 0.711             | 20974.3                                    | 174.5                                         | 16.227                         | 22.995                     | 0.68                   | 621             | 6.3              | 0.09                      | 292.7          | 0.021             | 125.4                       | 0.708             | 20986.7                                    | 175.6                                         | 16.129                         |
| 39              | 0.4              | 1.00                      | 282.7          | 0.032             | 100.1                       | 0.100             | 22829.2                                    | 253.8                                         | 21.018                         | 26.701                     | 0.00                   | 39              | 0.4              | 1.00                      | 282.7          | 0.032             | 100.1                       | 0.100             | 22829.2                                    | 253.8                                         | 21.018                         |
| 390             | 8.0              | 0.03                      | 279.8          | 0.016             | 96.6                        | 0.244             | 33854.4                                    | 117.8                                         | 28.442                         | 68.715                     | 0.88                   | 390             | 7.9              | 0.03                      | 279.8          | 0.016             | 96.6                        | 0.244             | 33847.8                                    | 117.8                                         | 28.435                         |
| 136             | 1.0              | 0.76                      | 299.7          | 0.002             | 82.7                        | 0.798             | 19118.5                                    | 194.8                                         | 11.360                         | 15.663                     | 0.14                   | 136             | 1.0              | 0.76                      | 299.7          | 0.002             | 82.6                        | 0.798             | 19117.0                                    | 194.8                                         | 11.358                         |
| 566             | 9.0              | 0.00                      | 285.5          | 0.013             | 166.2                       | 0.252             | 17942.2                                    | 315.6                                         | 0.000                          | 30.839                     | 0.00                   | 566             | 9.0              | 0.00                      | 285.5          | 0.013             | 166.2                       | 0.252             | 17942.2                                    | 315.6                                         | 0.000                          |
| 1536            | 9.0              | 0.16                      | 285.0          | 0.027             | 91.5                        | 0.743             | 17984.9                                    | 131.1                                         | 30.272                         | 35.658                     | 0.45                   | 1421            | 8.8              | 0.17                      | 285.5          | 0.027             | 93.5                        | 0.729             | 18359.9                                    | 134.0                                         | 28.502                         |
| 1794            | 4.7              | 0.19                      | 279.7          | 0.036             | 40.1                        | 0.969             | 14933.2                                    | 60.9                                          | 73.898                         | 72.917                     | 0.28                   | 1693            | 4.6              | 0.19                      | 280.1          | 0.036             | 40.6                        | 0.967             | 15034.8                                    | 62.4                                          | 72.727                         |
| 520             | 4.3              | 0.18                      | 267.0          | 0.059             | 42.3                        | 0.497             | 19894.1                                    | 99.4                                          | 37.745                         | 75.822                     | 0.04                   | 491             | 4.2              | 0.20                      | 266.8          | 0.059             | 42.5                        | 0.482             | 20240.9                                    | 97.4                                          | 38.383                         |
| 669             | 6.7              | 0.17                      | 267.0          | 0.052             | 26.2                        | 0.667             | 18997.7                                    | 72.0                                          | 46.374                         | 114.044                    | 0.00                   | 640             | 6.5              | 0.18                      | 267.1          | 0.052             | 26.3                        | 0.668             | 19187.6                                    | 72.8                                          | 46.173                         |

weighting e-folding distance = 1,000 km

weighting e-folding distance = 750 km

| $\tau_{\text{soil}}^{**}$<br>yr | anthro.  <br>fractional | Elevation§<br>m | Slope§<br>% rise | floodplain§<br>fractional | MAT¶<br>Kelvin | T CV¶<br>unitless | MAP¶<br>cm yr <sup>-1</sup> | P CV¶<br>unitless | $C_{\text{soil}}^{\sim}$<br>tC km <sup>-2</sup> | NPP**<br>tC km <sup>-2</sup> yr <sup>-1</sup> | $\tau_{\text{ecosystem}}^{\sim}$<br>yr | $\tau_{\text{soil}}^{**}$<br>yr | anthro.  <br>fractional | Elevation§<br>m | Slope§<br>% rise | floodplain§<br>fractional | MAT¶<br>Kelvin | T CV¶<br>unitless | MAP¶<br>cm yr <sup>-1</sup> | P CV¶<br>unitless | $C_{\text{soil}}^{\sim}$<br>tC km <sup>-2</sup> | NPP**<br>tC km <sup>-2</sup> yr <sup>-1</sup> |
|---------------------------------|-------------------------|-----------------|------------------|---------------------------|----------------|-------------------|-----------------------------|-------------------|-------------------------------------------------|-----------------------------------------------|----------------------------------------|---------------------------------|-------------------------|-----------------|------------------|---------------------------|----------------|-------------------|-----------------------------|-------------------|-------------------------------------------------|-----------------------------------------------|
| 16.722                          | 0.05                    | 200             | 1.3              | 0.75                      | 299.2          | 0.002             | 190.6                       | 0.476             | 21934.2                                         | 331.8                                         | 11.881                                 | 13.637                          | 0.04                    | 168.738         | 1.108            | 0.745                     | 299.341        | 0.002             | 189.980                     | 0.481             | 21761.825                                       | 335.211                                       |
| 51.253                          | 0.14                    | 2320            | 14.0             | 0.25                      | 285.3          | 0.019             | 131.5                       | 0.939             | 12852.8                                         | 153.9                                         | 53.163                                 | 38.058                          | 0.20                    | 2090.359        | 13.487           | 0.282                     | 286.558        | 0.018             | 142.292                     | 0.940             | 13365.840                                       | 161.560                                       |
| 12.955                          | 0.90                    | 518             | 8.1              | 0.19                      | 297.0          | 0.005             | 216.3                       | 0.638             | 15571.3                                         | 266.3                                         | 10.754                                 | 12.938                          | 0.90                    | 513.465         | 8.088            | 0.193                     | 297.031        | 0.005             | 216.040                     | 0.640             | 15577.133                                       | 266.592                                       |
| 15.659                          | 0.14                    | 134             | 1.0              | 0.76                      | 299.7          | 0.002             | 82.3                        | 0.798             | 19105.2                                         | 194.4                                         | 11.347                                 | 15.628                          | 0.14                    | 133.709         | 0.970            | 0.765                     | 299.694        | 0.002             | 82.188                      | 0.798             | 19100.269                                       | 194.194                                       |
| 67.812                          | 0.10                    | 1126            | 8.7              | 0.10                      | 279.8          | 0.027             | 58.3                        | 0.430             | 22649.9                                         | 93.7                                          | 42.442                                 | 68.582                          | 0.12                    | 1060.409        | 8.444            | 0.099                     | 280.079        | 0.026             | 60.969                      | 0.448             | 23196.230                                       | 95.623                                        |
| 182.665                         | 0.00                    | 533             | 4.8              | 0.18                      | 262.4          | 0.055             | 19.0                        | 0.615             | 37406.5                                         | 50.2                                          | 123.096                                | 187.907                         | 0.00                    | 521.009         | 4.706            | 0.188                     | 262.473        | 0.055             | 18.902                      | 0.615             | 37788.436                                       | 49.782                                        |
| 14.890                          | 0.09                    | 584             | 1.6              | 0.46                      | 297.4          | 0.002             | 132.8                       | 0.555             | 17436.0                                         | 280.3                                         | 12.086                                 | 14.761                          | 0.05                    | 555.141         | 1.578            | 0.449                     | 297.471        | 0.003             | 133.146                     | 0.555             | 17310.914                                       | 275.329                                       |
| 14.667                          | 0.09                    | 591             | 1.5              | 0.47                      | 297.5          | 0.002             | 135.1                       | 0.534             | 17291.1                                         | 288.3                                         | 12.060                                 | 14.050                          | 0.05                    | 563.738         | 1.492            | 0.476                     | 297.563        | 0.002             | 136.563                     | 0.524             | 17074.378                                       | 286.456                                       |
| 27.636                          | 0.02                    | 337             | 4.4              | 0.05                      | 279.6          | 0.036             | 93.4                        | 0.105             | 26122.8                                         | 245.5                                         | 24.479                                 | 27.589                          | 0.02                    | 332.303         | 4.389            | 0.051                     | 279.685        | 0.036             | 93.490                      | 0.103             | 26094.395                                       | 245.404                                       |
| 30.799                          | 0.66                    | 380             | 4.2              | 0.32                      | 282.5          | 0.029             | 58.3                        | 0.301             | 18904.4                                         | 135.9                                         | 19.366                                 | 33.658                          | 0.71                    | 358.178         | 3.958            | 0.324                     | 282.652        | 0.029             | 56.348                      | 0.303             | 19131.762                                       | 132.513                                       |
| 20.122                          | 0.24                    | 272             | 2.7              | 0.26                      | 282.7          | 0.033             | 94.6                        | 0.128             | 12701.1                                         | 201.7                                         | 12.651                                 | 20.157                          | 0.26                    | 264.550         | 2.631            | 0.269                     | 282.744        | 0.033             | 94.647                      | 0.127             | 12733.594                                       | 201.007                                       |
| 101.152                         | 0.80                    | 452             | 4.9              | 0.00                      | 278.5          | 0.016             | 101.0                       | 0.217             | 39385.8                                         | 123.2                                         | 34.927                                 | 101.152                         | 0.80                    | 451.997         | 4.939            | 0.000                     | 278.481        | 0.016             | 101.015                     | 0.217             | 39385.780                                       | 123.162                                       |
| 68.715                          | 0.88                    | 241             | 7.2              | 0.00                      | 280.9          | 0.016             | 92.7                        | 0.227             | 21816.9                                         | 117.8                                         | 16.286                                 | 68.715                          | 0.88                    | 239.539         | 7.138            | 0.000                     | 280.923        | 0.016             | 92.672                      | 0.227             | 21816.858                                       | 117.829                                       |
| 29.322                          | 0.01                    | 753             | 11.6             | 0.02                      | 283.9          | 0.014             | 103.9                       | 0.871             | 29790.1                                         | 225.4                                         | 25.401                                 | 29.550                          | 0.01                    | 747.431         | 11.629           | 0.015                     | 283.901        | 0.014             | 103.967                     | 0.871             | 29763.948                                       | 225.516                                       |
| 43.717                          | 0.01                    | 1201            | 10.2             | 0.07                      | 275.4          | 0.030             | 58.0                        | 0.272             | 17882.6                                         | 111.0                                         | 36.317                                 | 45.542                          | 0.01                    | 1203.837        | 10.221           | 0.070                     | 275.437        | 0.030             | 57.074                      | 0.274             | 18059.430                                       | 109.568                                       |
| 36.068                          | 0.78                    | 800             | 5.1              | 0.65                      | 294.7          | 0.019             | 95.6                        | 1.229             | 14084.4                                         | 90.4                                          | 44.331                                 | 34.750                          | 0.78                    | 770.291         | 4.937            | 0.656                     | 294.753        | 0.019             | 97.912                      | 1.218             | 14095.742                                       | 91.043                                        |
| 15.999                          | 0.90                    | 1111            | 17.7             | 0.13                      | 295.0          | 0.012             | 168.5                       | 0.848             | 14244.5                                         | 241.8                                         | 11.560                                 | 15.999                          | 0.90                    | 1104.652        | 17.655           | 0.132                     | 295.027        | 0.012             | 168.498                     | 0.848             | 14244.510                                       | 241.831                                       |
| 30.851                          | 0.67                    | 405             | 1.7              | 0.56                      | 299.9          | 0.013             | 95.5                        | 1.200             | 18917.7                                         | 114.3                                         | 23.719                                 | 29.435                          | 0.63                    | 396.868         | 1.791            | 0.556                     | 299.954        | 0.013             | 96.403                      | 1.198             | 18766.073                                       | 116.961                                       |
| 147.229                         | 0.00                    | 376             | 4.0              | 0.42                      | 258.0          | 0.074             | 21.4                        | 0.682             | 25208.6                                         | 42.0                                          | 78.216                                 | 145.476                         | 0.00                    | 308.275         | 3.420            | 0.462                     | 258.263        | 0.073             | 20.839                      | 0.658             | 25515.557                                       | 41.807                                        |
| 171.912                         | 0.01                    | 352             | 3.2              | 0.27                      | 271.2          | 0.037             | 40.9                        | 0.388             | 44140.8                                         | 97.0                                          | 67.657                                 | 169.245                         | 0.01                    | 346.248         | 3.211            | 0.275                     | 271.204        | 0.037             | 41.059                      | 0.385             | 44371.381                                       | 97.773                                        |
| 176.701                         | 0.00                    | 293             | 3.6              | 0.40                      | 260.0          | 0.069             | 20.5                        | 0.552             | 28980.7                                         | 50.7                                          | 80.060                                 | 182.568                         | 0.00                    | 257.411         | 3.263            | 0.440                     | 259.969        | 0.069             | 19.806                      | 0.547             | 29125.353                                       | 50.306                                        |
| 74.487                          | 0.01                    | 366             | 4.0              | 0.25                      | 261.1          | 0.077             | 27.3                        | 0.614             | 21593.8                                         | 71.3                                          | 53.026                                 | 90.413                          | 0.00                    | 326.737         | 3.881            | 0.245                     | 260.367        | 0.078             | 26.508                      | 0.593             | 21699.895                                       | 63.552                                        |
| 212.030                         | 0.00                    | 594             | 4.9              | 0.36                      | 266.3          | 0.058             | 28.5                        | 0.464             | 38867.9                                         | 56.5                                          | 116.280                                | 223.463                         | 0.00                    | 571.686         | 4.818            | 0.358                     | 266.036        | 0.058             | 27.917                      | 0.463             | 39675.699                                       | 54.427                                        |
| 20.991                          | 0.34                    | 627             | 5.0              | 0.41                      | 297.2          | 0.008             | 135.2                       | 0.839             | 16590.4                                         | 255.9                                         | 14.243                                 | 16.627                          | 0.40                    | 549.418         | 4.550            | 0.437                     | 297.599        | 0.008             | 137.094                     | 0.836             | 16615.572                                       | 261.611                                       |
| 45.901                          | 0.48                    | 376             | 1.2              | 0.64                      | 285.8          | 0.033             | 83.9                        | 0.320             | 19633.4                                         | 153.5                                         | 20.876                                 | 33.163                          | 0.47                    | 326.428         | 1.203            | 0.656                     | 286.204        | 0.032             | 87.869                      | 0.292             | 19189.286                                       | 163.899                                       |
| 121.274                         | 0.30                    | 135             | 1.1              | 0.77                      | 270.9          | 0.051             | 39.9                        | 0.464             | 38627.1                                         | 96.8                                          | 55.134                                 | 139.885                         | 0.17                    | 119.729         | 1.108            | 0.756                     | 270.076        | 0.051             | 40.137                      | 0.460             | 37955.796                                       | 93.568                                        |
| 41.795                          | 0.55                    | 1358            | 8.3              | 0.51                      | 291.2          | 0.019             | 111.6                       | 1.107             | 13877.8                                         | 114.8                                         | 47.246                                 | 36.385                          | 0.56                    | 1254.654        | 8.030            | 0.527                     | 291.751        | 0.018             | 118.034                     | 1.095             | 14150.041                                       | 118.741                                       |
| 22.802                          | 0.68                    | 489             | 6.2              | 0.11                      | 293.1          | 0.021             | 131.8                       | 0.693             | 21132.0                                         | 183.4                                         | 15.535                                 | 21.426                          | 0.71                    | 446.654         | 6.090            | 0.111                     | 293.255        | 0.021             | 134.179                     | 0.688             | 21211.356                                       | 186.114                                       |
| 26.701                          | 0.00                    | 39              | 0.4              | 1.00                      | 282.7          | 0.032             | 100.1                       | 0.100             | 22829.2                                         | 253.8                                         | 21.018                                 | 26.701                          | 0.00                    | 39.498          | 0.439            | 1.000                     | 282.726        | 0.032             | 100.110                     | 0.100             | 22829.231                                       | 253.809                                       |
| 68.715                          | 0.88                    | 387             | 7.9              | 0.04                      | 279.8          | 0.016             | 96.6                        | 0.244             | 33795.1                                         | 117.8                                         | 28.377                                 | 68.715                          | 0.88                    | 385.824         | 7.849            | 0.037                     | 279.788        | 0.016             | 96.563                      | 0.244             | 33773.178                                       | 117.829                                       |
| 15.659                          | 0.14                    | 134             | 1.0              | 0.76                      | 299.7          | 0.002             | 82.3                        | 0.798             | 19105.2                                         | 194.4                                         | 11.347                                 | 15.628                          | 0.14                    | 133.709         | 0.970            | 0.765                     | 299.694        | 0.002             | 82.188                      | 0.798             | 19100.269                                       | 194.194                                       |
| 30.839                          | 0.00                    | 562             | 9.0              | 0.00                      | 285.5          | 0.013             | 166.2                       | 0.252             | 17942.2                                         | 315.6                                         | 30.839                                 | 30.839                          | 0.00                    | 560.323         | 8.980            | 0.000                     | 285.537        | 0.013             | 166.210                     | 0.252             | 17942.224                                       | 315.571                                       |
| 34.445                          | 0.47                    | 743             | 6.7              | 0.27                      | 288.0          | 0.028             | 106.1                       | 0.639             | 20781.9                                         | 150.1                                         | 20.760                                 | 29.150                          | 0.58                    | 575.851         | 5.920            | 0.307                     | 288.601        | 0.029             | 109.384                     | 0.616             | 21499.356                                       | 153.227                                       |
| 70.988                          | 0.30                    | 1166            | 4.2              | 0.22                      | 282.4          | 0.036             | 45.0                        | 0.949             | 15458.8                                         | 75.0                                          | 59.072                                 | 57.005                          | 0.46                    | 1042.764        | 4.074            | 0.238                     | 282.992        | 0.036             | 46.662                      | 0.944             | 15500.841                                       | 79.556                                        |
| 79.057                          | 0.04                    | 298             | 3.2              | 0.33                      | 265.5          | 0.059             | 43.4                        | 0.382             | 23499.3                                         | 78.9                                          | 45.249                                 | 108.786                         | 0.01                    | 242.575         | 2.812            | 0.386                     | 264.989        | 0.059             | 43.512                      | 0.355             | 24672.325                                       | 71.959                                        |
| 116.059                         | 0.00                    | 405             | 4.9              | 0.27                      | 268.1          | 0.050             | 28.2                        | 0.658             | 19911.2                                         | 77.1                                          | 42.437                                 | 124.145                         | 0.00                    | 325.706         | 4.271            | 0.316                     | 268.627        | 0.048             | 29.310                      | 0.649             | 19751.880                                       | 77.327                                        |

weighting e-folding distance = 500 km

| $\tau_{ecosystem}^{-1}$<br>yr | $\tau_{soil}^{**}$<br>yr | anthro.  <br>fractional | Elevation§<br>m | Slope§<br>% rise | floodplain§<br>fractional | MAT¶<br>Kelvin | T CV¶<br>unitless | MAP¶<br>cm yr <sup>-1</sup> | P CV¶<br>unitless | $C_{soil}^{-1}$<br>tC km <sup>-2</sup> | NPP**<br>tC km <sup>-2</sup> yr <sup>-1</sup> | $\tau_{ecosystem}^{-1}$<br>yr | $\tau_{soil}^{**}$<br>yr | anthro.  <br>fractional | Soil $\Delta^{14}C$ (0-<br>100cm) ^<br>% | Soil age (0-<br>100cm) ^<br>yr | Soil $\Delta^{14}C$ (0-<br>30cm) ^<br>% | Soil age (0-<br>30cm) ^<br>yr | Soil $\Delta^{14}C$ (30-<br>100cm) ^<br>% | Soil age (30-<br>100cm) ^<br>yr | Elevation§<br>m | Slope§<br>% rise |
|-------------------------------|--------------------------|-------------------------|-----------------|------------------|---------------------------|----------------|-------------------|-----------------------------|-------------------|----------------------------------------|-----------------------------------------------|-------------------------------|--------------------------|-------------------------|------------------------------------------|--------------------------------|-----------------------------------------|-------------------------------|-------------------------------------------|---------------------------------|-----------------|------------------|
| 11.670                        | 13.094                   | 0.04                    | 148.272         | 1.010            | 0.715                     | 299.426        | 0.002             | 186.629                     | 0.492             | 21716.254                              | 338.873                                       | 11.495                        | 12.605                   | 0.04                    | -112.8                                   | 1658                           | 21.8                                    | 359                           | -242.8                                    | 2918                            | 246.493         | 1.275            |
| 46.254                        | 34.007                   | 0.23                    | 1720.299        | 12.349           | 0.341                     | 288.603        | 0.017             | 159.973                     | 0.948             | 14150.013                              | 171.858                                       | 35.945                        | 28.310                   | 0.27                    | -135.5                                   | 1966                           | -23.1                                   | 676                           | -264.9                                    | 3527                            | 1098.093        | 9.275            |
| 10.744                        | 12.931                   | 0.90                    | 504.594         | 7.997            | 0.197                     | 297.040        | 0.005             | 215.538                     | 0.642             | 15589.756                              | 267.158                                       | 10.721                        | 12.918                   | 0.90                    | -139.8                                   | 1809                           | -30.2                                   | 656                           | -247.8                                    | 2949                            | 478.488         | 7.729            |
| 11.342                        | 15.615                   | 0.14                    | 132.382         | 0.971            | 0.766                     | 299.693        | 0.002             | 81.912                      | 0.797             | 19090.205                              | 193.852                                       | 11.332                        | 15.589                   | 0.14                    | -160.9                                   | 2172                           | -12.7                                   | 517                           | -273.9                                    | 3427                            | 128.482         | 0.975            |
| 42.100                        | 68.380                   | 0.13                    | 942.308         | 7.940            | 0.102                     | 280.563        | 0.025             | 67.376                      | 0.483             | 24082.614                              | 100.739                                       | 40.952                        | 67.151                   | 0.14                    | -149.1                                   | 2063                           | -34.0                                   | 648                           | -261.9                                    | 3441                            | 710.710         | 7.253            |
| 124.769                       | 190.535                  | 0.00                    | 496.112         | 4.497            | 0.211                     | 262.604        | 0.055             | 18.707                      | 0.614             | 38550.037                              | 48.821                                        | 128.284                       | 196.531                  | 0.00                    | -504.7                                   | 16037                          | -272.3                                  | 4104                          | -690.2                                    | 25596                           | 418.594         | 3.818            |
| 11.930                        | 15.170                   | 0.05                    | 514.381         | 1.670            | 0.430                     | 297.508        | 0.003             | 131.618                     | 0.574             | 17336.143                              | 261.525                                       | 11.774                        | 16.411                   | 0.04                    | -95.0                                    | 1393                           | 21.8                                    | 329                           | -205.8                                    | 2410                            | 446.770         | 2.063            |
| 11.870                        | 14.167                   | 0.04                    | 526.030         | 1.519            | 0.479                     | 297.682        | 0.002             | 138.165                     | 0.516             | 16844.191                              | 280.203                                       | 11.604                        | 14.708                   | 0.03                    | -92.3                                    | 1372                           | 24.4                                    | 321                           | -203.8                                    | 2388                            | 477.123         | 1.693            |
| 24.425                        | 27.572                   | 0.03                    | 322.550         | 4.281            | 0.055                     | 279.804        | 0.036             | 93.700                      | 0.101             | 26032.884                              | 245.151                                       | 24.312                        | 27.542                   | 0.03                    | -100.5                                   | 1337                           | -16.4                                   | 517                           | -205.4                                    | 2384                            | 294.189         | 3.965            |
| 19.794                        | 35.047                   | 0.72                    | 321.791         | 3.586            | 0.338                     | 282.849        | 0.029             | 53.097                      | 0.306             | 19486.381                              | 126.149                                       | 20.574                        | 37.866                   | 0.75                    | -184.0                                   | 2586                           | -57.2                                   | 805                           | -300.3                                    | 4200                            | 254.816         | 2.962            |
| 12.644                        | 20.172                   | 0.27                    | 250.102         | 2.527            | 0.288                     | 282.876        | 0.033             | 94.799                      | 0.127             | 12797.205                              | 199.653                                       | 12.628                        | 20.201                   | 0.29                    | -91.6                                    | 1331                           | 6.0                                     | 403                           | -208.1                                    | 2449                            | 210.799         | 2.247            |
| 34.927                        | 101.152                  | 0.80                    | 451.198         | 4.937            | 0.000                     | 278.481        | 0.016             | 101.015                     | 0.217             | 39385.780                              | 123.162                                       | 34.927                        | 101.152                  | 0.81                    |                                          |                                |                                         |                               |                                           |                                 | 448.814         | 4.933            |
| 16.286                        | 68.715                   | 0.88                    | 237.584         | 7.079            | 0.000                     | 280.923        | 0.016             | 92.672                      | 0.227             | 21816.859                              | 117.829                                       | 16.286                        | 68.715                   | 0.89                    | -161.7                                   | 2120                           | -38.1                                   | 647                           | -278.5                                    | 3531                            | 231.765         | 6.906            |
| 25.361                        | 29.645                   | 0.01                    | 737.284         | 11.609           | 0.016                     | 283.883        | 0.014             | 104.143                     | 0.870             | 29711.005                              | 225.688                                       | 25.281                        | 29.833                   | 0.01                    | -131.1                                   | 1874                           | -13.8                                   | 535                           | -248.8                                    | 3237                            | 707.443         | 11.535           |
| 36.802                        | 46.217                   | 0.01                    | 1213.351        | 10.441           | 0.070                     | 275.461        | 0.030             | 55.764                      | 0.280             | 18410.355                              | 107.046                                       | 37.621                        | 47.373                   | 0.01                    | -180.5                                   | 2530                           | -56.1                                   | 871                           | -308.4                                    | 4262                            | 1249.612        | 12.132           |
| 43.232                        | 34.427                   | 0.78                    | 698.178         | 4.579            | 0.679                     | 295.000        | 0.019             | 102.072                     | 1.200             | 14178.364                              | 91.404                                        | 40.354                        | 34.127                   | 0.79                    | -139.4                                   | 1993                           | -21.3                                   | 664                           | -247.2                                    | 3273                            | 447.484         | 3.180            |
| 11.560                        | 15.999                   | 0.90                    | 1091.473        | 17.533           | 0.136                     | 295.027        | 0.012             | 168.498                     | 0.848             | 14244.511                              | 241.831                                       | 11.560                        | 15.999                   | 0.90                    | -135.8                                   | 1881                           | -22.6                                   | 644                           | -240.1                                    | 3033                            | 1052.460        | 17.166           |
| 22.989                        | 28.865                   | 0.61                    | 380.251         | 1.907            | 0.540                     | 300.013        | 0.012             | 97.946                      | 1.193             | 18469.054                              | 122.305                                       | 21.608                        | 27.761                   | 0.58                    | -182.0                                   | 2284                           | -85.6                                   | 1150                          | -263.5                                    | 3237                            | 335.710         | 2.259            |
| 79.464                        | 144.696                  | 0.00                    | 203.783         | 2.543            | 0.538                     | 258.651        | 0.071             | 19.919                      | 0.618             | 25937.736                              | 41.170                                        | 82.017                        | 142.776                  | 0.00                    | -473.7                                   | 13453                          | -245.7                                  | 3999                          | -674.9                                    | 21956                           | 72.754          | 1.289            |
| 67.611                        | 168.093                  | 0.01                    | 336.342         | 3.218            | 0.281                     | 271.249        | 0.037             | 41.389                      | 0.379             | 44825.738                              | 99.411                                        | 67.516                        | 165.733                  | 0.01                    | -274.1                                   | 4528                           | -93.6                                   | 1208                          | -428.6                                    | 7486                            | 311.462         | 3.308            |
| 81.941                        | 184.927                  | 0.00                    | 202.847         | 2.741            | 0.515                     | 259.950        | 0.068             | 18.823                      | 0.540             | 29432.436                              | 49.342                                        | 85.799                        | 189.182                  | 0.00                    | -481.1                                   | 13728                          | -256.5                                  | 3987                          | -667.5                                    | 22013                           | 117.087         | 1.802            |
| 54.965                        | 97.563                   | 0.00                    | 284.282         | 3.873            | 0.214                     | 259.420        | 0.078             | 25.957                      | 0.565             | 21565.008                              | 52.414                                        | 57.966                        | 107.630                  | 0.00                    | -423.1                                   | 10643                          | -221.6                                  | 3328                          | -631.7                                    | 18292                           | 250.827         | 4.080            |
| 118.931                       | 224.774                  | 0.00                    | 532.025         | 4.695            | 0.349                     | 265.680        | 0.059             | 26.989                      | 0.458             | 41015.670                              | 51.494                                        | 122.932                       | 224.640                  | 0.00                    | -472.4                                   | 13872                          | -239.8                                  | 3332                          | -643.5                                    | 21680                           | 422.715         | 4.054            |
| 13.914                        | 15.797                   | 0.42                    | 456.591         | 3.973            | 0.473                     | 298.136        | 0.007             | 139.628                     | 0.829             | 16586.686                              | 270.655                                       | 13.524                        | 14.860                   | 0.44                    | -114.8                                   | 1568                           | -17.4                                   | 628                           | -211.8                                    | 2502                            | 378.791         | 3.361            |
| 18.938                        | 29.965                   | 0.45                    | 271.096         | 1.171            | 0.667                     | 286.317        | 0.032             | 92.187                      | 0.257             | 18573.492                              | 177.871                                       | 16.678                        | 26.048                   | 0.44                    | -111.1                                   | 1674                           | 10.4                                    | 417                           | -234.5                                    | 2939                            | 261.456         | 1.199            |
| 55.413                        | 144.524                  | 0.13                    | 112.208         | 1.246            | 0.721                     | 268.850        | 0.051             | 39.686                      | 0.456             | 35392.334                              | 85.894                                        | 55.370                        | 149.731                  | 0.09                    | -328.5                                   | 6460                           | -142.7                                  | 1851                          | -494.9                                    | 10625                           | 119.833         | 1.403            |
| 43.670                        | 34.687                   | 0.57                    | 1061.577        | 7.357            | 0.568                     | 292.732        | 0.018             | 129.326                     | 1.077             | 14677.299                              | 123.668                                       | 37.284                        | 32.382                   | 0.59                    | -137.1                                   | 1970                           | -20.5                                   | 660                           | -253.8                                    | 3347                            | 625.849         | 5.022            |
| 15.378                        | 20.954                   | 0.72                    | 381.572         | 5.984            | 0.121                     | 293.492        | 0.021             | 138.322                     | 0.680             | 21387.954                              | 190.477                                       | 15.190                        | 20.192                   | 0.73                    | -119.3                                   | 1721                           | 7.3                                     | 437                           | -228.8                                    | 2820                            | 285.637         | 5.804            |
| 21.018                        | 26.701                   | 0.00                    | 39.498          | 0.439            | 1.000                     | 282.726        | 0.032             | 100.110                     | 0.100             | 22829.231                              | 253.809                                       | 21.018                        | 26.701                   | 0.00                    |                                          |                                |                                         |                               |                                           |                                 | 39.498          | 0.439            |
| 28.352                        | 68.715                   | 0.88                    | 383.247         | 7.791            | 0.038                     | 279.788        | 0.016             | 96.563                      | 0.244             | 33729.299                              | 117.829                                       | 28.304                        | 68.715                   | 0.88                    | -243.1                                   | 4219                           | -80.1                                   | 1255                          | -400.7                                    | 7093                            | 375.305         | 7.615            |
| 11.342                        | 15.615                   | 0.14                    | 132.382         | 0.971            | 0.766                     | 299.693        | 0.002             | 81.912                      | 0.797             | 19090.205                              | 193.852                                       | 11.332                        | 15.589                   | 0.14                    | -160.9                                   | 2172                           | -12.7                                   | 517                           | -273.9                                    | 3427                            | 128.482         | 0.975            |
| 30.839                        | 30.839                   | 0.00                    | 557.268         | 8.973            | 0.000                     | 285.537        | 0.013             | 166.210                     | 0.252             | 17942.225                              | 315.571                                       |                               | 30.839                   | 0.00                    | -131.0                                   | 1919                           | -9.4                                    | 494                           | -267.8                                    | 3517                            | 548.152         | 8.950            |
| 19.744                        | 28.630                   | 0.61                    | 371.406         | 4.777            | 0.375                     | 289.200        | 0.029             | 113.142                     | 0.586             | 22568.299                              | 155.088                                       | 19.276                        | 29.055                   | 0.66                    | -114.4                                   | 1687                           | 11.9                                    | 426                           | -217.1                                    | 2713                            | 173.416         | 3.184            |
| 53.130                        | 52.075                   | 0.51                    | 860.053         | 3.878            | 0.277                     | 283.930        | 0.036             | 49.285                      | 0.943             | 15467.478                              | 86.287                                        | 43.017                        | 44.321                   | 0.60                    | -180.8                                   | 2578                           | -35.9                                   | 653                           | -276.7                                    | 3812                            | 467.740         | 2.933            |
| 48.069                        | 119.073                  | 0.01                    | 168.471         | 2.241            | 0.474                     | 264.344        | 0.058             | 43.164                      | 0.320             | 26139.139                              | 62.249                                        | 52.086                        | 131.551                  | 0.00                    | -377.4                                   | 8014                           | -175.4                                  | 2349                          | -571.4                                    | 13521                           | 81.820          | 1.375            |
| 40.290                        | 123.111                  | 0.00                    | 223.696         | 3.349            | 0.394                     | 269.587        | 0.045             | 31.016                      | 0.635             | 18998.753                              | 75.714                                        | 36.587                        | 116.976                  | 0.00                    | -376.3                                   | 8244                           | -164.4                                  | 2073                          | -532.0                                    | 12918                           | 142.399         | 2.349            |

weighting e-folding distance = 250 km

weighting e-folding distance = 100 km

| floodplain§<br>fractional | MAT¶<br>Kelvin | T CV¶<br>unitless | MAP¶<br>cm yr <sup>-1</sup> | P CV¶<br>unitless | C <sub>soil</sub> <sup>⊖</sup><br>tC km <sup>-2</sup> | NPP**<br>tC km <sup>-2</sup> yr <sup>-1</sup> | τ <sub>ecosystem</sub> <sup>⊖</sup><br>yr | τ <sub>soil</sub> **<br>yr | anthro.¶<br>fractional | Elevation§<br>m | Slope§<br>% rise | floodplain§<br>fractional | MAT¶<br>Kelvin | T CV¶<br>unitless | MAP¶<br>cm yr <sup>-1</sup> | P CV¶<br>unitless | C <sub>soil</sub> <sup>⊖</sup><br>tC km <sup>-2</sup> | NPP**<br>tC km <sup>-2</sup> yr <sup>-1</sup> | τ <sub>ecosystem</sub> <sup>⊖</sup><br>yr | τ <sub>soil</sub> **<br>yr | anthro.¶<br>fractional |
|---------------------------|----------------|-------------------|-----------------------------|-------------------|-------------------------------------------------------|-----------------------------------------------|-------------------------------------------|----------------------------|------------------------|-----------------|------------------|---------------------------|----------------|-------------------|-----------------------------|-------------------|-------------------------------------------------------|-----------------------------------------------|-------------------------------------------|----------------------------|------------------------|
| 0.611                     | 298.386        | 0.002             | 171.452                     | 0.504             | 22096.362                                             | 341.266                                       | 11.443                                    | 12.519                     | 0.05                   | 2584.757        | 5.619            | 0.173                     | 288.124        | 0.001             | 95.227                      | 0.358             | 22358.196                                             | 340.089                                       | 11.025                                    | 13.051                     | 0.05                   |
| 0.486                     | 292.180        | 0.015             | 188.513                     | 0.975             | 15079.320                                             | 179.664                                       | 22.913                                    | 22.600                     | 0.39                   | 349.222         | 3.430            | 0.773                     | 296.738        | 0.014             | 190.465                     | 0.971             | 14527.087                                             | 176.116                                       | 15.879                                    | 22.589                     | 0.57                   |
| 0.208                     | 297.065        | 0.005             | 214.121                     | 0.648             | 15635.760                                             | 268.804                                       | 10.644                                    | 12.878                     | 0.90                   | 409.043         | 6.998            | 0.230                     | 297.118        | 0.005             | 210.767                     | 0.663             | 15843.120                                             | 272.876                                       | 10.361                                    | 12.779                     | 0.88                   |
| 0.770                     | 299.692        | 0.002             | 81.070                      | 0.797             | 19059.068                                             | 192.830                                       | 11.302                                    | 15.511                     | 0.14                   | 117.521         | 1.016            | 0.772                     | 299.690        | 0.002             | 78.475                      | 0.795             | 18958.075                                             | 189.848                                       | 11.206                                    | 15.285                     | 0.13                   |
| 0.107                     | 281.454        | 0.023             | 88.549                      | 0.558             | 25408.725                                             | 121.195                                       | 35.855                                    | 60.085                     | 0.17                   | 482.375         | 7.199            | 0.106                     | 282.163        | 0.020             | 124.360                     | 0.624             | 25944.797                                             | 173.007                                       | 25.410                                    | 41.515                     | 0.14                   |
| 0.286                     | 262.948        | 0.056             | 18.070                      | 0.617             | 40739.060                                             | 45.852                                        | 139.653                                   | 218.886                    | 0.00                   | 227.233         | 2.123            | 0.495                     | 263.391        | 0.056             | 16.628                      | 0.637             | 45664.360                                             | 40.855                                        | 172.133                                   | 277.883                    | 0.00                   |
| 0.334                     | 297.345        | 0.004             | 118.376                     | 0.689             | 18348.597                                             | 216.319                                       | 11.947                                    | 20.604                     | 0.05                   | 339.971         | 2.629            | 0.170                     | 297.135        | 0.006             | 95.065                      | 0.845             | 20101.889                                             | 184.523                                       | 12.624                                    | 24.289                     | 0.08                   |
| 0.478                     | 297.819        | 0.002             | 138.150                     | 0.533             | 16657.693                                             | 254.650                                       | 11.127                                    | 16.919                     | 0.02                   | 485.965         | 2.370            | 0.376                     | 297.561        | 0.003             | 128.837                     | 0.650             | 15946.666                                             | 197.906                                       | 10.490                                    | 21.517                     | 0.03                   |
| 0.067                     | 280.153        | 0.035             | 94.272                      | 0.094             | 25821.654                                             | 244.343                                       | 23.956                                    | 27.483                     | 0.04                   | 223.844         | 3.221            | 0.095                     | 280.999        | 0.034             | 95.121                      | 0.082             | 25201.952                                             | 241.868                                       | 22.972                                    | 27.532                     | 0.06                   |
| 0.376                     | 283.163        | 0.030             | 47.902                      | 0.307             | 19812.215                                             | 113.721                                       | 21.963                                    | 44.437                     | 0.79                   | 168.096         | 2.132            | 0.484                     | 283.754        | 0.030             | 43.455                      | 0.271             | 19301.896                                             | 99.590                                        | 23.241                                    | 53.216                     | 0.83                   |
| 0.344                     | 283.239        | 0.033             | 95.159                      | 0.127             | 12972.065                                             | 195.794                                       | 12.559                                    | 20.283                     | 0.34                   | 130.491         | 1.650            | 0.485                     | 284.031        | 0.033             | 95.579                      | 0.126             | 13305.168                                             | 187.212                                       | 12.244                                    | 20.467                     | 0.48                   |
| 0.000                     | 278.481        | 0.016             | 101.015                     | 0.217             | 39385.780                                             | 123.162                                       | 34.927                                    | 101.152                    | 0.81                   | 441.770         | 4.917            | 0.000                     | 278.481        | 0.016             | 101.015                     | 0.217             | 39385.780                                             | 123.162                                       | 34.927                                    | 101.152                    | 0.83                   |
| 0.000                     | 280.923        | 0.016             | 92.672                      | 0.227             | 21816.857                                             | 117.829                                       | 16.286                                    | 68.715                     | 0.89                   | 214.810         | 6.409            | 0.000                     | 280.923        | 0.016             | 92.672                      | 0.227             | 21816.859                                             | 117.829                                       | 16.286                                    | 68.715                     | 0.90                   |
| 0.018                     | 283.831        | 0.014             | 104.666                     | 0.870             | 29547.815                                             | 226.191                                       | 25.034                                    | 30.382                     | 0.01                   | 624.864         | 11.212           | 0.025                     | 283.685        | 0.014             | 106.129                     | 0.867             | 29038.308                                             | 227.458                                       | 24.263                                    | 31.765                     | 0.00                   |
| 0.062                     | 275.600        | 0.029             | 55.115                      | 0.300             | 19249.769                                             | 101.712                                       | 38.981                                    | 49.387                     | 0.01                   | 1277.908        | 18.066           | 0.024                     | 276.137        | 0.027             | 64.495                      | 0.357             | 20568.914                                             | 96.286                                        | 39.079                                    | 49.284                     | 0.01                   |
| 0.769                     | 296.083        | 0.017             | 110.390                     | 1.163             | 14578.208                                             | 88.896                                        | 30.325                                    | 34.492                     | 0.83                   | 79.570          | 0.726            | 0.926                     | 297.981        | 0.016             | 114.880                     | 1.117             | 14782.637                                             | 84.264                                        | 17.230                                    | 34.966                     | 0.85                   |
| 0.147                     | 295.027        | 0.012             | 168.498                     | 0.848             | 14244.510                                             | 241.831                                       | 11.560                                    | 15.999                     | 0.91                   | 940.884         | 16.060           | 0.181                     | 295.027        | 0.012             | 168.498                     | 0.848             | 14244.511                                             | 241.831                                       | 11.560                                    | 15.999                     | 0.92                   |
| 0.491                     | 300.166        | 0.012             | 100.717                     | 1.170             | 17685.439                                             | 137.482                                       | 18.263                                    | 24.720                     | 0.48                   | 242.588         | 2.835            | 0.404                     | 300.462        | 0.011             | 100.074                     | 1.097             | 16431.619                                             | 166.243                                       | 14.198                                    | 18.655                     | 0.38                   |
| 0.669                     | 259.148        | 0.068             | 18.536                      | 0.550             | 26142.911                                             | 39.225                                        | 87.625                                    | 135.338                    | 0.00                   | 26.881          | 0.663            | 0.816                     | 259.274        | 0.067             | 17.157                      | 0.509             | 26426.895                                             | 37.463                                        | 98.734                                    | 121.770                    | 0.00                   |
| 0.297                     | 271.369        | 0.037             | 42.380                      | 0.361             | 46139.822                                             | 104.375                                       | 67.241                                    | 158.417                    | 0.01                   | 264.512         | 3.706            | 0.349                     | 271.617        | 0.036             | 44.842                      | 0.320             | 50055.512                                             | 116.398                                       | 67.258                                    | 139.757                    | 0.02                   |
| 0.672                     | 259.913        | 0.066             | 17.315                      | 0.531             | 30284.542                                             | 46.686                                        | 95.357                                    | 196.744                    | 0.00                   | 50.590          | 0.899            | 0.845                     | 259.731        | 0.064             | 15.535                      | 0.527             | 31965.594                                             | 41.817                                        | 110.124                                   | 203.569                    | 0.00                   |
| 0.128                     | 258.305        | 0.077             | 25.861                      | 0.543             | 20392.227                                             | 39.253                                        | 65.463                                    | 118.611                    | 0.00                   | 218.141         | 4.229            | 0.075                     | 257.463        | 0.076             | 24.754                      | 0.578             | 19940.850                                             | 30.267                                        | 85.765                                    | 121.143                    | 0.00                   |
| 0.354                     | 265.180        | 0.060             | 25.622                      | 0.430             | 44500.247                                             | 49.116                                        | 131.538                                   | 229.072                    | 0.00                   | 211.864         | 2.227            | 0.468                     | 264.855        | 0.062             | 25.045                      | 0.381             | 51602.889                                             | 51.507                                        | 148.728                                   | 293.189                    | 0.00                   |
| 0.516                     | 298.911        | 0.006             | 142.095                     | 0.810             | 16451.619                                             | 289.893                                       | 13.317                                    | 13.717                     | 0.48                   | 703.030         | 6.544            | 0.265                     | 300.023        | 0.005             | 131.911                     | 0.761             | 16606.011                                             | 284.174                                       | 17.139                                    | 14.140                     | 0.67                   |
| 0.649                     | 284.673        | 0.032             | 90.918                      | 0.234             | 18607.853                                             | 185.425                                       | 15.799                                    | 23.847                     | 0.44                   | 321.152         | 1.417            | 0.570                     | 281.983        | 0.035             | 82.419                      | 0.240             | 19606.158                                             | 173.988                                       | 17.545                                    | 25.874                     | 0.47                   |
| 0.687                     | 267.326        | 0.051             | 37.329                      | 0.461             | 30304.227                                             | 72.097                                        | 54.758                                    | 155.394                    | 0.09                   | 129.647         | 1.395            | 0.696                     | 266.443        | 0.051             | 35.197                      | 0.466             | 26383.144                                             | 64.595                                        | 52.040                                    | 152.842                    | 0.13                   |
| 0.700                     | 295.095        | 0.016             | 148.854                     | 1.046             | 15839.043                                             | 122.450                                       | 25.343                                    | 31.373                     | 0.67                   | 106.147         | 1.012            | 0.931                     | 298.189        | 0.014             | 150.311                     | 0.980             | 16961.242                                             | 98.341                                        | 17.210                                    | 36.962                     | 0.79                   |
| 0.139                     | 293.887        | 0.021             | 146.684                     | 0.673             | 21917.292                                             | 197.547                                       | 15.158                                    | 18.989                     | 0.75                   | 210.493         | 5.312            | 0.188                     | 294.430        | 0.020             | 157.528                     | 0.693             | 22930.447                                             | 200.310                                       | 15.756                                    | 18.380                     | 0.77                   |
| 1.000                     | 282.726        | 0.032             | 100.110                     | 0.100             | 22829.231                                             | 253.809                                       | 21.018                                    | 26.701                     | 0.00                   | 39.498          | 0.439            | 1.000                     | 282.726        | 0.032             | 100.110                     | 0.100             | 22829.231                                             | 253.809                                       | 21.018                                    | 26.701                     | 0.00                   |
| 0.042                     | 279.788        | 0.016             | 96.563                      | 0.244             | 33597.963                                             | 117.829                                       | 28.158                                    | 68.715                     | 0.89                   | 349.870         | 7.090            | 0.056                     | 279.788        | 0.016             | 96.563                      | 0.244             | 33209.843                                             | 117.829                                       | 27.727                                    | 68.715                     | 0.90                   |
| 0.770                     | 299.692        | 0.002             | 81.070                      | 0.797             | 19059.068                                             | 192.830                                       | 11.302                                    | 15.511                     | 0.14                   | 117.521         | 1.016            | 0.772                     | 299.690        | 0.002             | 78.475                      | 0.795             | 18958.075                                             | 189.848                                       | 11.206                                    | 15.285                     | 0.13                   |
| 0.000                     | 285.537        | 0.013             | 166.210                     | 0.252             | 17942.225                                             | 315.571                                       |                                           | 30.839                     | 0.00                   | 521.472         | 8.881            | 0.000                     | 285.537        | 0.013             | 166.210                     | 0.252             | 17942.224                                             | 315.571                                       |                                           | 30.839                     | 0.00                   |
| 0.505                     | 289.457        | 0.030             | 113.159                     | 0.556             | 24328.836                                             | 146.644                                       | 20.514                                    | 33.296                     | 0.74                   | 92.986          | 2.025            | 0.638                     | 289.104        | 0.032             | 101.068                     | 0.551             | 26175.473                                             | 123.246                                       | 22.853                                    | 41.083                     | 0.81                   |
| 0.451                     | 285.688        | 0.035             | 52.937                      | 0.995             | 15118.063                                             | 90.487                                        | 25.956                                    | 35.383                     | 0.79                   | 103.570         | 1.288            | 0.729                     | 286.565        | 0.036             | 54.324                      | 1.123             | 15401.077                                             | 81.436                                        | 19.127                                    | 38.483                     | 0.92                   |
| 0.579                     | 263.573        | 0.056             | 41.677                      | 0.281             | 26702.097                                             | 51.713                                        | 55.249                                    | 134.223                    | 0.00                   | 37.866          | 0.912            | 0.649                     | 263.145        | 0.055             | 40.128                      | 0.262             | 25256.498                                             | 47.336                                        | 53.443                                    | 114.597                    | 0.00                   |
| 0.532                     | 270.726        | 0.040             | 31.985                      | 0.627             | 17147.233                                             | 69.094                                        | 32.294                                    | 98.715                     | 0.00                   | 98.244          | 1.489            | 0.697                     | 271.020        | 0.038             | 31.532                      | 0.619             | 16284.709                                             | 61.076                                        | 31.538                                    | 78.638                     | 0.00                   |

Table S4. Multiple linear regression (MLR) results and statistics, including correlation coefficients ( $r$  values) and statistical significance  $p$  values.

|                                 | correlation coefficients, $r$ |                     |                            |                     |                     | statistical significance $p$ -values* |                     |                            |                     |                     |
|---------------------------------|-------------------------------|---------------------|----------------------------|---------------------|---------------------|---------------------------------------|---------------------|----------------------------|---------------------|---------------------|
|                                 | bulk POC                      |                     | n-alkanoic ("fatty") acids |                     | lignin phenols      | bulk POC                              |                     | n-alkanoic ("fatty") acids |                     | lignin phenols      |
|                                 | $\delta^{13}\text{C}$         | $^{14}\text{C}$ age | $\delta^{13}\text{C}$      | $^{14}\text{C}$ age | $^{14}\text{C}$ age | $\delta^{13}\text{C}$                 | $^{14}\text{C}$ age | $\delta^{13}\text{C}$      | $^{14}\text{C}$ age | $^{14}\text{C}$ age |
| Sample type†                    | 0.2690                        | 0.1408              | 0.2432                     | 0.4319              | 0.6543              | 8.11E-02                              | 3.68E-01            | 1.87E-01                   | 3.41E-03            | 5.96E-03            |
| Runoff                          | -0.009                        | -0.091              | -0.059                     | -0.283              | -0.586              | 9.54E-01                              | 5.66E-01            | 7.56E-01                   | 6.64E-02            | 1.70E-02            |
| Elevation                       | 0.291                         | 0.142               | 0.148                      | -0.226              | -0.511              | 5.86E-02                              | 3.64E-01            | 4.28E-01                   | 1.40E-01            | 4.30E-02            |
| log TSS Yield                   | 0.370                         | 0.289               | 0.231                      | -0.291              | -0.300              | 1.88E-02                              | 7.06E-02            | 2.20E-01                   | 6.48E-02            | 2.60E-01            |
| log POC Yield                   | 0.141                         | 0.398               | 0.135                      | -0.138              | -0.169              | 3.85E-01                              | 1.11E-02            | 4.76E-01                   | 3.90E-01            | 5.32E-01            |
| MAT                             | 0.393                         | -0.533              | 0.091                      | -0.772              | -0.764              | 9.09E-03                              | 2.32E-04            | 6.28E-01                   | 8.66E-10            | 5.66E-04            |
| T CV                            | -0.229                        | 0.563               | 0.057                      | 0.759               | 0.863               | 1.40E-01                              | 8.59E-05            | 7.62E-01                   | 2.33E-09            | 1.70E-05            |
| log MAP                         | 0.177                         | -0.496              | -0.032                     | -0.727              | -0.716              | 2.57E-01                              | 7.26E-04            | 8.64E-01                   | 2.32E-08            | 1.81E-03            |
| P CV                            | 0.588                         | 0.145               | 0.472                      | -0.191              | -0.353              | 3.43E-05                              | 3.52E-01            | 7.34E-03                   | 2.15E-01            | 1.80E-01            |
| Permafrost (% contin.)          | -0.142                        | 0.490               | 0.141                      | 0.645               | 0.608               | 3.63E-01                              | 8.61E-04            | 4.48E-01                   | 2.30E-06            | 1.25E-02            |
| Permafrost (% discontin.)       | -0.198                        | 0.520               | -0.065                     | 0.460               | 0.418               | 2.04E-01                              | 3.55E-04            | 7.29E-01                   | 1.66E-03            | 1.07E-01            |
| Soil C stock                    | -0.483                        | 0.297               | -0.345                     | 0.580               | 0.390               | 1.03E-03                              | 5.32E-02            | 5.71E-02                   | 3.70E-05            | 1.36E-01            |
| NPP                             | -0.049                        | -0.364              | -0.301                     | -0.451              | -0.534              | 7.54E-01                              | 1.65E-02            | 9.93E-02                   | 2.12E-03            | 3.31E-02            |
| $\tau_{\text{ecosystem}}$       | -0.002                        | 0.767               | 0.069                      | 0.620               | 0.362               | 9.89E-01                              | 3.24E-09            | 7.11E-01                   | 9.19E-06            | 1.68E-01            |
| $\tau_{\text{soil}}$            | -0.300                        | 0.643               | -0.140                     | 0.766               | 0.576               | 5.09E-02                              | 3.33E-06            | 4.54E-01                   | 1.39E-09            | 1.96E-02            |
| Longitude                       | 0.069                         | -0.107              | 0.175                      | 0.040               | 0.037               | 6.58E-01                              | 4.95E-01            | 3.45E-01                   | 7.95E-01            | 8.91E-01            |
| log Area                        | 0.054                         | 0.118               | -0.119                     | 0.070               | 0.175               | 7.33E-01                              | 4.50E-01            | 5.23E-01                   | 6.51E-01            | 5.16E-01            |
| Slope                           | 0.033                         | 0.155               | 0.096                      | -0.166              | -0.307              | 8.32E-01                              | 3.22E-01            | 6.07E-01                   | 2.83E-01            | 2.47E-01            |
| Floodplain (fractional area)    | 0.346                         | -0.162              | 0.049                      | -0.027              | 0.177               | 2.32E-02                              | 2.99E-01            | 7.92E-01                   | 8.62E-01            | 5.12E-01            |
| Anthropogenic (fractional area) | 0.074                         | -0.380              | 0.179                      | -0.526              | -0.570              | 6.35E-01                              | 1.21E-02            | 3.35E-01                   | 2.43E-04            | 2.11E-02            |

\*All correlations deemed as significant for the purposes of this study (i.e.,  $p < 0.05$ ) are highlighted in red.

†Sample type descriptions have been replaced by a dummy variable: 1 = suspended sediments, 2 = bank and bedload sediments, 3 = estuary/shelf/slope/etc. deposits.

**Table S5. Redundancy analysis (RDA) results and statistics, including control variable loadings, response variable loadings, and individual sample scores for each RDA canonical axis.**

|                            | Control variable loadings ("biplot scores")* |        |        |        |        |
|----------------------------|----------------------------------------------|--------|--------|--------|--------|
|                            | RDA1                                         | RDA2   | RDA3   | RDA4   | RDA5   |
| Sample type†               | 0.263                                        | -0.383 | 0.565  | -0.334 | -0.135 |
| Runoff                     | -0.217                                       | 0.078  | -0.242 | 0.177  | -0.183 |
| Elevation                  | -0.230                                       | -0.293 | -0.415 | 0.067  | 0.330  |
| log TSS Yield              | -0.161                                       | -0.440 | -0.570 | 0.147  | -0.210 |
| log POC Yield              | 0.051                                        | -0.299 | -0.593 | 0.247  | -0.149 |
| MAT                        | -0.881                                       | -0.043 | -0.279 | -0.111 | -0.031 |
| T CV                       | 0.836                                        | -0.157 | 0.267  | 0.124  | -0.102 |
| log MAP                    | -0.779                                       | 0.081  | -0.307 | 0.026  | -0.070 |
| P CV                       | -0.274                                       | -0.598 | -0.190 | 0.029  | 0.253  |
| Permafrost (% contin.)     | 0.689                                        | -0.216 | 0.299  | 0.134  | -0.059 |
| Permafrost (% discontin.)  | 0.603                                        | -0.098 | -0.105 | 0.086  | -0.124 |
| Soil C stock               | 0.713                                        | 0.254  | 0.052  | -0.110 | 0.339  |
| NPP                        | -0.503                                       | 0.250  | -0.313 | -0.198 | -0.294 |
| $\tau_{\text{ecosystem}}$  | 0.870                                        | -0.276 | -0.103 | -0.072 | 0.304  |
| $\tau_{\text{soil}}$       | 0.905                                        | -0.017 | 0.111  | -0.057 | 0.214  |
| $f_{\text{anthropogenic}}$ | -0.537                                       | 0.097  | -0.074 | 0.411  | -0.067 |

  

|                                                         | Response variable loadings* |        |        |        |        |
|---------------------------------------------------------|-----------------------------|--------|--------|--------|--------|
|                                                         | RDA1                        | RDA2   | RDA3   | RDA4   | RDA5   |
| bulk POC $\delta^{13}\text{C}$                          | -0.411                      | -0.742 | 0.029  | -0.191 | -0.018 |
| bulk POC $^{14}\text{C}$ age                            | 0.699                       | -0.421 | -0.348 | 0.054  | -0.014 |
| <i>n</i> -alkanoic ("fatty") acid $\delta^{13}\text{C}$ | -0.135                      | -0.499 | 0.182  | 0.246  | 0.053  |
| <i>n</i> -alkanoic ("fatty") acid $^{14}\text{C}$ age   | 0.819                       | -0.065 | 0.262  | -0.121 | 0.066  |
| lignin phenol $^{14}\text{C}$ age                       | 0.305                       | -0.081 | 0.215  | 0.054  | -0.146 |

  

|                                 | Individual sample scores ("site scores") |        |        |        |        |
|---------------------------------|------------------------------------------|--------|--------|--------|--------|
|                                 | RDA1                                     | RDA2   | RDA3   | RDA4   | RDA5   |
| Amazon @ Obidos                 | -0.631                                   | 1.154  | -1.453 | -1.934 | -1.760 |
| Brahmaputra @ Jamuna Bridge     | -1.023                                   | -1.507 | -0.967 | 0.058  | 0.853  |
| Brahmaputra @ Jamuna Bridge     | -0.910                                   | -0.742 | -1.594 | 0.407  | 0.935  |
| Cagayan @ mouth                 | -1.260                                   | 1.043  | 0.037  | 0.399  | -0.753 |
| Cariaco (composite) @ mouth     | -2.029                                   | -0.986 | 1.247  | -1.668 | 0.535  |
| Columbia @ Portland             | -1.009                                   | -0.444 | 1.145  | -1.578 | 1.549  |
| Colville @ Nuiqsut              | 3.558                                    | -0.511 | -1.343 | 0.021  | 1.716  |
| Congo @ Boma                    | -1.307                                   | 0.967  | 0.071  | -0.445 | 0.909  |
| Congo @ Brazzaville             | -1.111                                   | 2.094  | -0.854 | -0.483 | 0.678  |
| Connecticut @ Lyme              | 0.465                                    | 2.165  | -0.871 | 1.429  | 0.380  |
| Danube @ Tulcea                 | -0.519                                   | 1.121  | -0.024 | 0.844  | -0.590 |
| Danube @ Tulcea                 | -0.406                                   | 1.886  | -0.650 | 1.193  | -0.508 |
| Danube @ Tulcea                 | -0.632                                   | 0.356  | 0.603  | 0.495  | -0.673 |
| Danube @ Tulcea                 | -0.632                                   | 0.356  | 0.603  | 0.495  | -0.673 |
| Delaware @ state border         | -0.479                                   | 1.322  | 0.224  | -0.209 | -1.268 |
| Dulnain @ Dulnain Bridge        | -0.127                                   | 3.079  | -0.074 | 1.156  | 1.234  |
| Earn @ Bridge of Earn           | -0.575                                   | 2.592  | 1.332  | 1.261  | 0.538  |
| Eel @ mouth                     | 0.279                                    | -0.801 | -0.670 | -0.435 | 0.240  |
| Fraser @ Hope                   | -0.421                                   | 0.224  | -0.038 | -0.208 | 1.056  |
| Fraser @ Hope                   | -0.534                                   | -0.541 | 0.589  | -0.557 | 0.973  |
| Ganga @ Harding Bridge          | -1.438                                   | -2.521 | -0.506 | 0.750  | 1.509  |
| Ganga @ Harding Bridge          | -1.551                                   | -3.286 | 0.121  | 0.401  | 1.427  |
| Gaoping @ mouth                 | -0.706                                   | 0.095  | -0.699 | 0.890  | -2.360 |
| Godavari @ Rajahmudi            | -1.948                                   | -3.745 | 1.257  | 0.037  | 0.365  |
| Indigirka @ mouth               | 2.625                                    | -1.727 | 1.675  | -0.104 | -0.827 |
| Kalix @ mouth                   | 1.469                                    | 1.987  | 1.271  | -1.872 | 2.425  |
| Kolyma @ mouth                  | 3.114                                    | 0.014  | 2.158  | -1.266 | -0.768 |
| Lena @ mouth                    | 2.190                                    | -1.776 | 2.039  | 3.710  | -0.568 |
| Mackenzie + Peel @ Tsiigehtchic | 3.545                                    | -1.803 | -1.870 | -0.657 | 0.408  |
| Mackenzie + Peel @ Tsiigehtchic | 3.658                                    | -1.038 | -2.497 | -0.308 | 0.490  |
| Mekong @ Phnom Penh             | -0.536                                   | 1.375  | -1.563 | -0.064 | -0.330 |
| Mississippi @ mouth             | -1.188                                   | -0.990 | 0.492  | -2.079 | -2.717 |
| Mississippi @ mouth             | -1.075                                   | -0.225 | -0.135 | -1.730 | -2.634 |
| Ob @ mouth                      | 1.821                                    | 2.003  | 0.816  | -1.401 | 0.910  |
| Ob @ mouth                      | 1.708                                    | 1.237  | 1.443  | -1.750 | 0.828  |
| Padma @ Mawa                    | -1.281                                   | -1.922 | -0.769 | 0.874  | 1.317  |
| Pearl @ Guangzhou               | -1.185                                   | -0.006 | -0.590 | 1.443  | -0.738 |
| Pettaquamscutt @ Narragansett   | 0.101                                    | -0.327 | 0.364  | -1.305 | -1.482 |
| Tay @ Earn confluence           | -0.523                                   | 1.999  | 0.066  | 2.317  | 1.031  |
| Unare @ mouth                   | -2.098                                   | 0.266  | 0.715  | -1.724 | 0.892  |
| Waiapu @ Ruatoria               | 1.055                                    | -1.470 | -0.709 | -0.853 | -0.926 |
| Yangzte @ Zhenjiang             | -0.847                                   | -0.514 | -0.188 | 2.681  | -0.049 |
| Yellow @ Binzhou                | -0.346                                   | -0.097 | -1.682 | -1.294 | -0.017 |
| Yenisey @ mouth                 | 1.236                                    | -0.595 | 1.821  | 1.926  | -0.524 |
| Yukon @ mouth                   | 1.504                                    | 0.237  | -0.341 | 1.133  | -3.031 |

\*Control and response variable loadings are scaled according to "Type-II" scaling (73).

†Sample type descriptions have been replaced by a dummy variable: 1 = suspended sediments, 2 = bank and bedload sediments, 3 = estuary/shelf/slope/etc. deposits.
